# Supplementary material
Source: Research Square preprint supplement (doi:10.21203/rs.3.rs-9493050/v1)
Supplement: Supplementary file 1 [file 6e0957f3f758ae045f554d30.pdf]

# Supplementary Information

## **Elevated CO<sub>2</sub> increases leaf temperature independently of stomatal regulation**

David Helman<sup>1,2,\*</sup>, Gabriel Mulero<sup>1,2</sup> and Emmanuel Tamata<sup>1</sup>

1. Department of Soil & Water Sciences, Institute of Environmental Sciences, The Robert H. Smith Faculty of Agriculture, Food and Environment, The Hebrew University of Jerusalem, Rehovot 7610001, Israel.

2. The Advanced School for Environmental Studies, The Hebrew University of Jerusalem, Givat Ram, Jerusalem 9190401, Israel.

\*Corresponding author: [david.helman@mail.huji.ac.il](mailto:david.helman@mail.huji.ac.il)

## 10 **The FACE system and its experimental design**

11 The study was conducted at the WheatDryFACE facility (Figure S1), operating since August 2022  
12 at the Hebrew University of Jerusalem's experimental farm in Rehovot, Israel (34°47'N, 31°54'E:  
13 54 m a.s.l). The area is characterized by a Mediterranean climate with a long-term (14 years; 2006–  
14 2020) mean daily temperature of  $21.1^{\circ}\text{C} \pm 5.4^{\circ}\text{C}$ , and a mean total annual precipitation of  $540 \pm$   
15  $55 \text{ mm y}^{-1}$ . The facility comprises six plots arranged in a randomized complete block split-plot  
16 design, including three free-air CO<sub>2</sub> enrichment (FACE) rings enriched to a target [CO<sub>2</sub>] level of  
17 *c.*  $600 \mu\text{mol mol}^{-1}$ , and three control plots maintained at ambient [CO<sub>2</sub>] levels (Figure S2). Ring  
18 placement accounted for the predominant wind direction to minimize CO<sub>2</sub> cross-contamination  
19 between treatments.

20 Each enrichment ring is designed as an octagonal ring, 8 m in diameter and enclosing an area of  
21 approximately 50 m<sup>2</sup> (Figure S3), constructed by engineers from Azrieli College of Engineering,  
22 Jerusalem. The rings consisted of eight iron masts arranged as an octagon, each supporting a PVC  
23 pipe connected to the main CO<sub>2</sub> supply line. CO<sub>2</sub> was released through 4-mm perforations in the  
24 PVC pipes positioned around the ring perimeter. Gas flow to each ring was regulated by a pressure  
25 gauge based on its distance from the main CO<sub>2</sub> storage tank, and a datalogger-based control unit  
26 positioned adjacent to each ring controlled the solenoid on/off valves for automated gas release.  
27 The control system operated based on the [CO<sub>2</sub>] measured at the center of each ring, along with  
28 wind speed and wind direction, such that only the relevant upwind sides of the octagon released  
29 CO<sub>2</sub>, generally following the FACE principles described by refs<sup>-2,3</sup>. The control unit was scheduled  
30 to operate during daytime hours, opening valves from 06:30 to 17:00. During this operating period,  
31 valves opened to 70% of capacity when 10-min mean wind speed was  $\leq 1 \text{ m s}^{-1}$  and ring-center  
32 [CO<sub>2</sub>] was below  $550 \mu\text{mol mol}^{-1}$ , whereas gas release was halted when wind speed reached  $\geq 8 \text{ m}$   
33  $\text{s}^{-1}$  and/or [CO<sub>2</sub>] exceeded target concentration. Actual measured [CO<sub>2</sub>] in the plots were  $581 \pm 66$   
34  $\mu\text{mol mol}^{-1}$  for elevated and  $421 \pm 21 \mu\text{mol mol}^{-1}$  for ambient CO<sub>2</sub> plots.

35 [CO<sub>2</sub>] in each enrichment ring were monitored continuously using a factory-calibrated infrared gas  
36 analyzer (WMA-5, PP systems Ltd, Amesbury, MA, USA) installed at the ring center (Figure S3).  
37 To further characterize the spatial distribution of [CO<sub>2</sub>] within enrichment rings, a lab-built low-  
38 cost monitoring system was deployed (Figure S4a,b). This system consisted of SCD30 [CO<sub>2</sub>]  
39 sensors (Sensirion AG, Stäfa, Switzerland) coupled to WeMos ESP32 D1 mini boards programmed  
40 to record data every 5 min. Twelve sensors were installed equidistantly within two enrichment  
41 rings at 1 m above ground level, although data from only one ring are reported here due to technical  
42 issues in the second ring. Sensor data were streamed to the ThingSpeak online platform and  
43 calibrated in situ against the central WMA-5 analyzer before the beginning of enrichment in the

44 first year of the WheatDryFACE project. After linear calibration, no significant differences were  
45 detected between the calibrated low-cost sensors and the reference analyzer during the pre-  
46 enrichment calibration period (Dunnett's test,  $p < 0.05$ ; Figure S4c,d). Monthly and seasonal  
47 averages during enrichment periods were subsequently used to map within-ring  $[CO_2]$  distribution  
48 and evaluate its relationship with wind conditions (Figure S5).

49 Installed within the WheatDryFACE field was a sensor network for microclimate monitoring  
50 (Figures S2 and S3). Air temperature and relative humidity ( $RH$ ; %) were measured using a Vaisala  
51 HMP-series HUMICAP® probe (Vaisala Oyj, Vantaa, Finland). Wind speed and wind direction  
52 were measured at 2 m above ground with a Wind Sentry anemometer (Model 03002; R.M. Young  
53 Company, Traverse City, MI, USA). Precipitation was recorded using a tipping-bucket rain gauge  
54 (Model 52203; R.M. Young Company, Traverse City, MI, USA). Incoming shortwave and  
55 longwave radiation were measured at 2.5 m height using a thermopile pyranometer (SP-510-SS)  
56 and pyrgeometer (SL-510-SS; Apogee Instruments, Logan, UT, USA), respectively. All  
57 meteorological data were logged automatically at 5-min intervals. Photosynthetically active  
58 radiation ( $PAR$ ;  $\mu\text{mol m}^{-2} \text{s}^{-1}$ ) was estimated from incoming shortwave radiation using a quantum-  
59 to-energy conversion factor ( $2.02 \mu\text{mol J}^{-1}$ )<sup>4</sup>. Within each ring, soil volumetric water content  
60 ( $VWC$ ; %) and soil temperature ( $T_{\text{soil}}$ ; °C) were measured at 20 and 55 cm depth using TDR-315H  
61 time-domain reflectometry sensors (Acclima Inc., Meridian, ID, USA); however, only data from  
62 20 cm depth were used in the present study.

63 Water regimes were managed using a retractable rain-exclusion system consisting of an  $8 \times 4$  m  
64 frame fitted with corrugated polycarbonate sheeting (SUNTUF, Palram Ltd., Ramat Yohanan,  
65 Israel), which covered half of the plot/ring area during exclusion events and remained retracted  
66 under normal conditions (Figure S6). Accordingly, the water treatment was applied as a split-plot  
67 factor within each ring. The shelters were deployed during rain events to facilitate two water  
68 regimes: well-watered (WW) and water-limited (WL).

69 In *Season 1* (2023/24), the total amount of rain and irrigation was 512 mm for the entire season  
70 (from two weeks before sowing – 12 November 2023 – to harvest – 19 March 2024) and 464 mm  
71 during the measurement period (up to the last thermal imaging on 22 February 2024). WL plots in  
72 that season received 323 mm, a reduction of 141 mm over the measurement period. In *Season 2*  
73 (2024/25), total water from rain and irrigation was less than in the first season – 434 mm for the  
74 entire season (from two weeks before sowing – 18 November 2024 – to harvest – 26 April 2025)  
75 and 403 mm during the measurement period (up to the last thermal imaging on 26 March 2025),  
76 with only 31 mm of rainwater excluded in the WL plots over the measurement period (a total of  
77 372 mm).

78 Two Israeli wheat genotypes, cv. *Zahir* (early-maturing) and cv. *Ruta* (late-maturing) <sup>5,6</sup> were  
79 cultivated (Figures S7 and S8). Each genotype was sown in sub-plots across all [CO<sub>2</sub>] and water  
80 treatments.

81 Although the WheatDryFACE has been operating for the last three years, we used data from only  
82 the last two years in this study, since thermal images were taken only in these two years. Detailed  
83 meteorological conditions for both seasons are summarized in Table S1.

#### 84 **Relationships with $\Delta T$ and statistically-derived [CO<sub>2</sub>]-driven mechanisms**

85 Before modeling  $\Delta T$ , we examined its relationships with various variables (Figure S18). While  $\Delta T$   
86 had parallel linear relationships with  $g_{sw}$ ,  $T_r$ ,  $VWC$ , and  $PAR$  at ambient and elevated [CO<sub>2</sub>]  
87 conditions, it had contrasting ambient-to-elevated [CO<sub>2</sub>] relationships with the other variables,  
88 likely indicating confounding processes under elevated [CO<sub>2</sub>]. The full parametric and non-  
89 parametric relationships among the time-variant variables are presented in Figure S19 and Figure  
90 S20, respectively.

91 To further evaluate the complex mechanisms by which elevated [CO<sub>2</sub>] influences  $\Delta T$ , we  
92 implemented a sequential model-building framework in which candidate variables representing  
93 different biophysical processes were added stepwise to a baseline model. To account for potential  
94 non-linear relationships, we used an ordinary least squares (OLS) model of a quadratic form. OLS  
95 was used because it provides an interpretable framework for estimating the contribution of multiple  
96 predictors to variation in  $\Delta T$  and for quantifying how the estimated CO<sub>2</sub> effect changes when  
97 additional explanatory variables are introduced. In this framework, model coefficients are  
98 estimated by minimizing the sum of squared differences between observed and predicted  $\Delta T$ . The  
99 model remains linear in its coefficients, while the inclusion of quadratic terms allows for non-linear  
100 relationships between the predictors and  $\Delta T$ .

101 The baseline model (B) includes CO<sub>2</sub> as the primary explanatory variable, together with  
102 background environmental control variables so that the explanatory contribution of the candidate  
103 mechanistic variables ( $g_{sw}$ ,  $LAI$ , height, and  $T_{soil}$ ) could be evaluated in subsequent model  
104 expansions. Genotype (G), water (W) and DAS were all included in B as categorical factors. Thus,  
105 B reads as follows:

$$106 \quad \Delta T (^{\circ}\text{C}) = \beta_0 + \beta_{\text{CO}_2} [\text{CO}_2] + \sum (\beta_i X_i + \gamma_i X_i^2) + G + W + \text{DAS} + \epsilon_i \quad (2)$$

107 where  $\beta_{\text{CO}_2}$  in (2) represents the effect of CO<sub>2</sub> on  $\Delta T$ , and  $X_i$  represents the control variables  $VPD$ ,  
108  $SWC$ ,  $PAR$ , and wind speed. These variables were calculated as daily means within the active  
109 measurement window for each sampling date.

110 We then expanded the baseline model stepwise by introducing variables corresponding to specific  
 111 hypothesized mechanisms. First,  $g_{sw}$  was added to represent physiological control of evaporative  
 112 cooling ( $B + g_{sw}$ ). Next, canopy structural variables ( $LAI$  and canopy height) were introduced to  
 113 account for the effects of canopy development on radiative loading and aerodynamic coupling ( $B$   
 114  $+ g_{sw} + LAI$  and  $B + g_{sw} + LAI + height$ ). Finally,  $T_{soil}$  was included as a proxy for soil-related  
 115 thermal and radiative conditions (full model). Because complete replicate coverage across all dates  
 116 was only available in *Season 2*, the sequential attribution analysis was performed using *Season 2*  
 117 data only. All analyses were conducted on plot-level means for each sampling date ( $N = 144$ ).

118 At each step, the model was re-fitted and the shift in  $\beta_{CO_2}$  was re-estimated:

$$119 \quad \beta_{CO_2} \text{ shift (\%)} = \left( \frac{\beta_{CO_2}^i - \beta_{CO_2}^{\text{baseline}}}{\beta_{CO_2}^{\text{baseline}}} \right) \times 100 \quad (3)$$

120 where  $\beta_{CO_2}^{\text{baseline}}$  and  $\beta_{CO_2}^i$  are the  $[CO_2]$  coefficients in the baseline ( $B$ ) and expanded model ( $B + g_{sw}$ ,  
 121  $B + g_{sw} + LAI$ ,  $B + g_{sw} + LAI + height$ , and full model), respectively.

122  $\beta_{CO_2}$  shift was then used to quantify the extent to which the newly introduced variables accounted  
 123 for the observed  $CO_2$  effect on  $\Delta T$ . In this framework, a reduction in  $\beta_{CO_2}$  indicates that the added  
 124 variable explains part of the  $CO_2$ -associated variation in  $\Delta T$ , whereas a negligible change indicates  
 125 limited explanatory power. Because each expanded model is nested within the previous one, this  
 126 sequential approach allows for a structured evaluation of competing mechanisms and their relative  
 127 contribution to the observed warming. The interpretation is therefore one of explanatory attribution  
 128 within the nested modelling framework. Multiple model specifications were evaluated (Table S3),  
 129 but only those representing the primary hypothesized mechanisms are presented in the main text  
 130 (Table S4).

131 To further interpret the selected model (Table S4), we examined partial-effect response curves for  
 132 specific predictors. These were used to visualize how changes in the selected variables were  
 133 associated with modeled changes in  $\Delta T$ , while the remaining terms in the model were held constant.

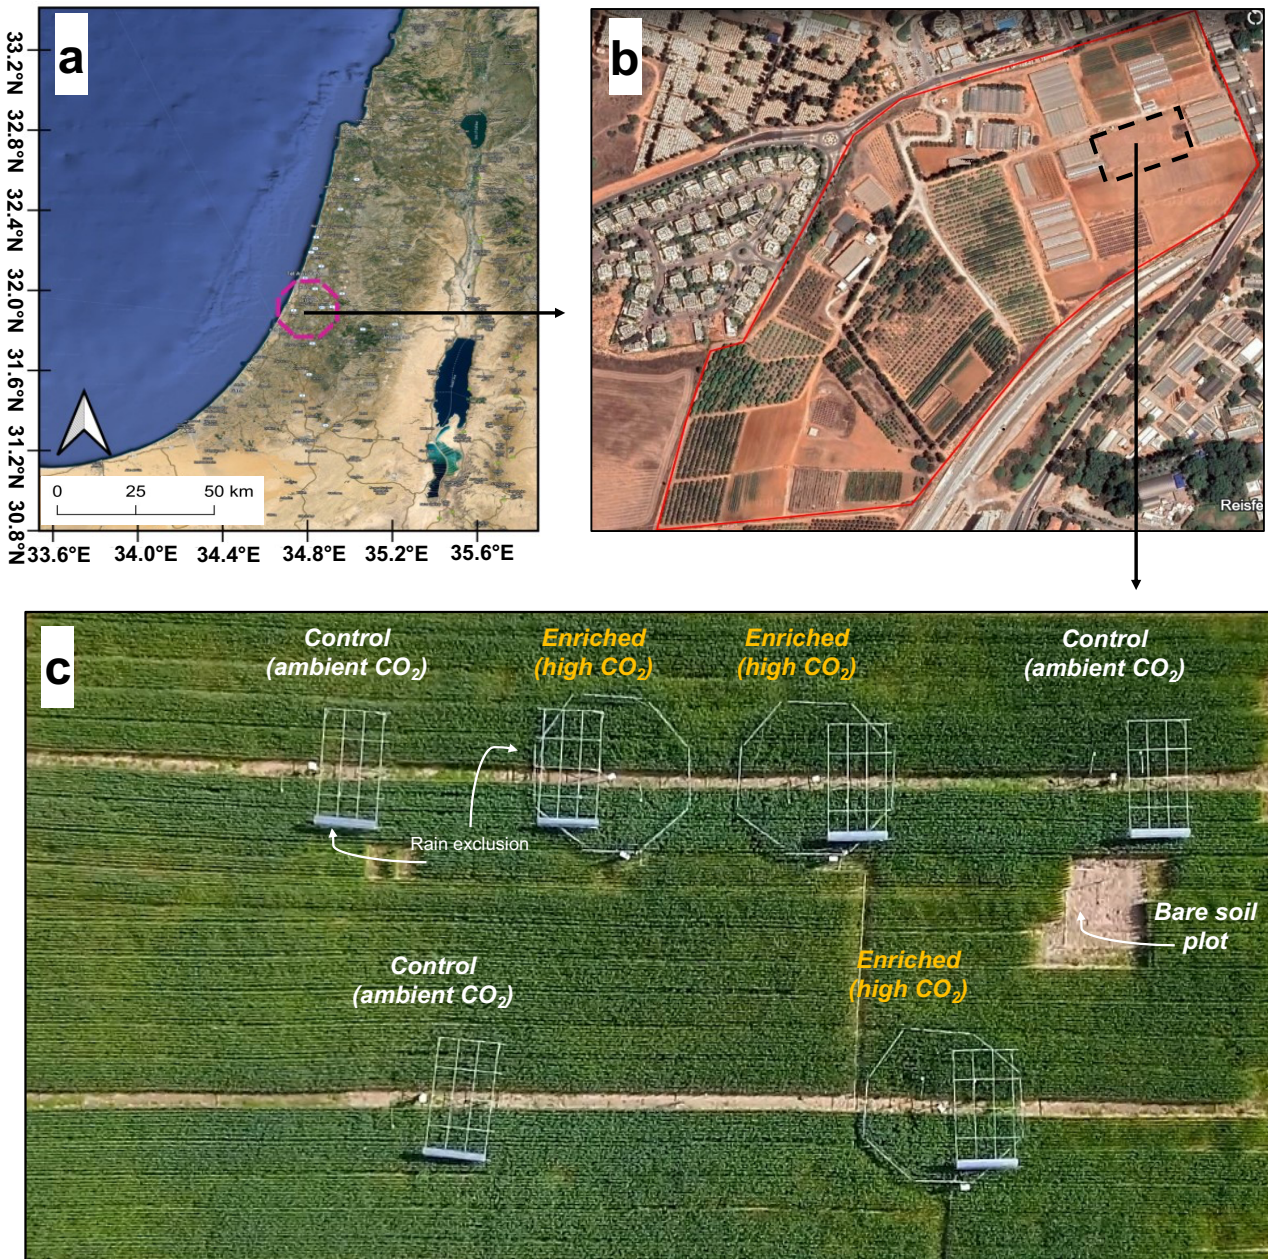

135

136 Figure S1. (a) Location of the study area in Israel, Rehovot. (b) An overview of the experimental  
 137 field within the Robert H. Smith, Faculty of Agriculture's Research Farm (red polygon). (c) UAV  
 138 RGB orthomosaic of the WheatDryFACE experimental field with all six experimental treatment  
 139 rings.

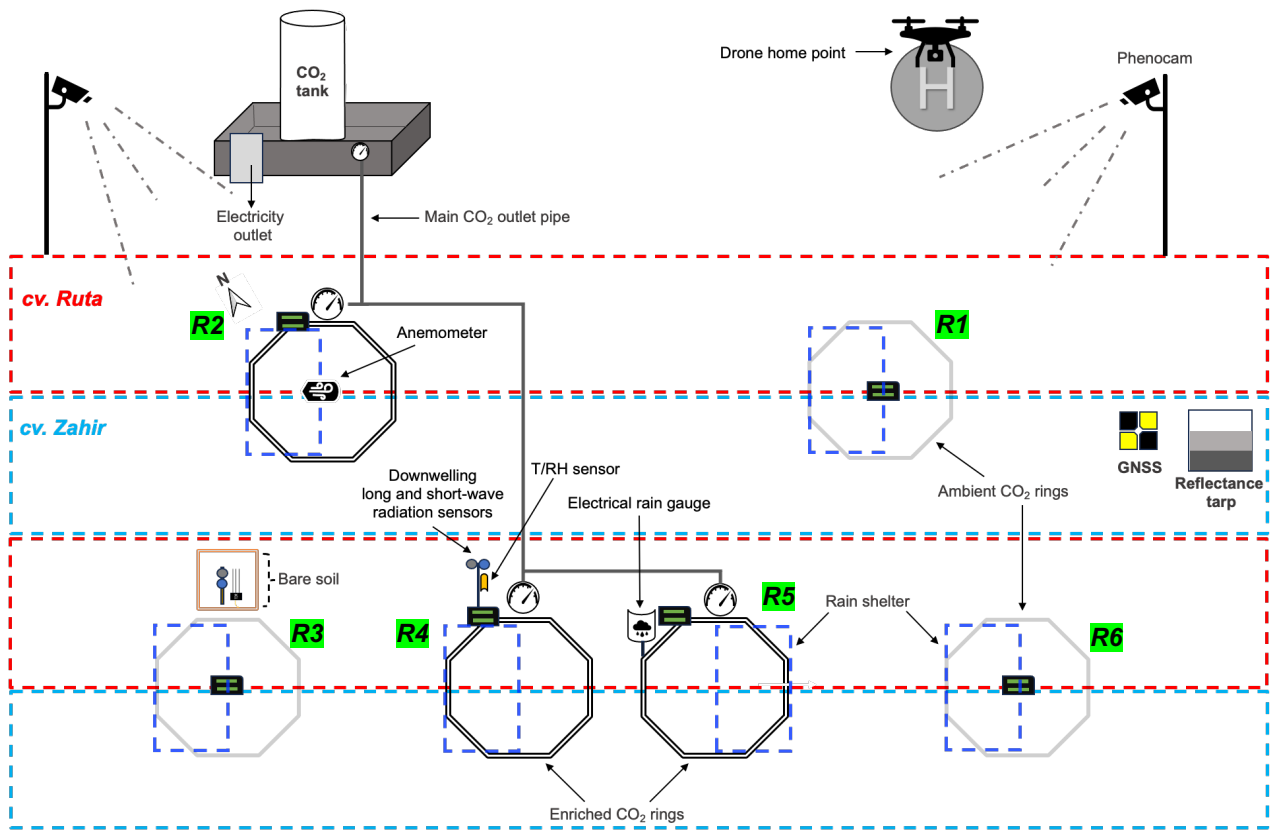

140

141 Figure S2. Schematic of the WheatDryFACE experimental field. The [CO<sub>2</sub>] enriched rings (R2, R4  
 142 and R5) are 8 m in diameter. The wheat genotypes (cv. Zahir and Ruta) are set up in alternating  
 143 areas. Bare soil with sensors is set up as a control plot for both soil water content and outgoing  
 144 radiation data. Within the project, an unmanned aerial vehicle (UAV) is flown; thus, we often set  
 145 up a 3 by 3 m reflectance tarp in the field and a high-precision GNSS receiver – Trimble SPS585.  
 146 Two PhenoCam cameras are installed at a height of 4 m facing the field (see images in Fig. S6) to  
 147 monitor crop growth during the growing season.

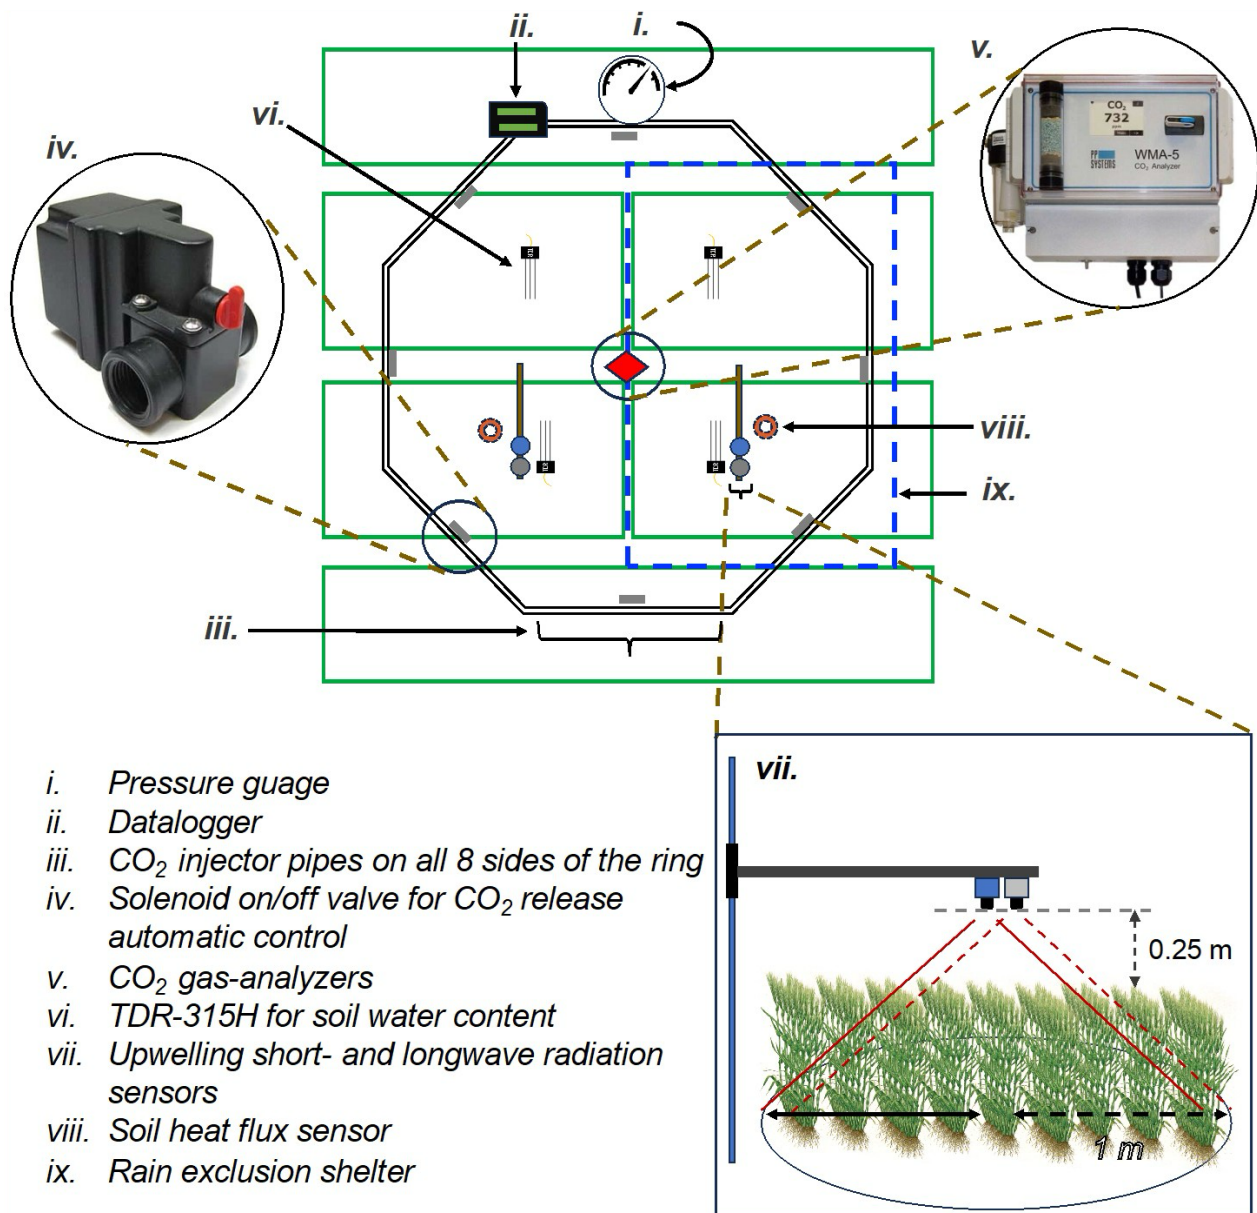

148

149 Figure S3. Schematics of a typical octagonal ring with [CO<sub>2</sub>] enrichment in WheatDryFACE,  
 150 showing major sensors installed within the enriched ring area. All items, except *iii* and *iv*, were  
 151 installed in the ambient [CO<sub>2</sub>] plots as well.

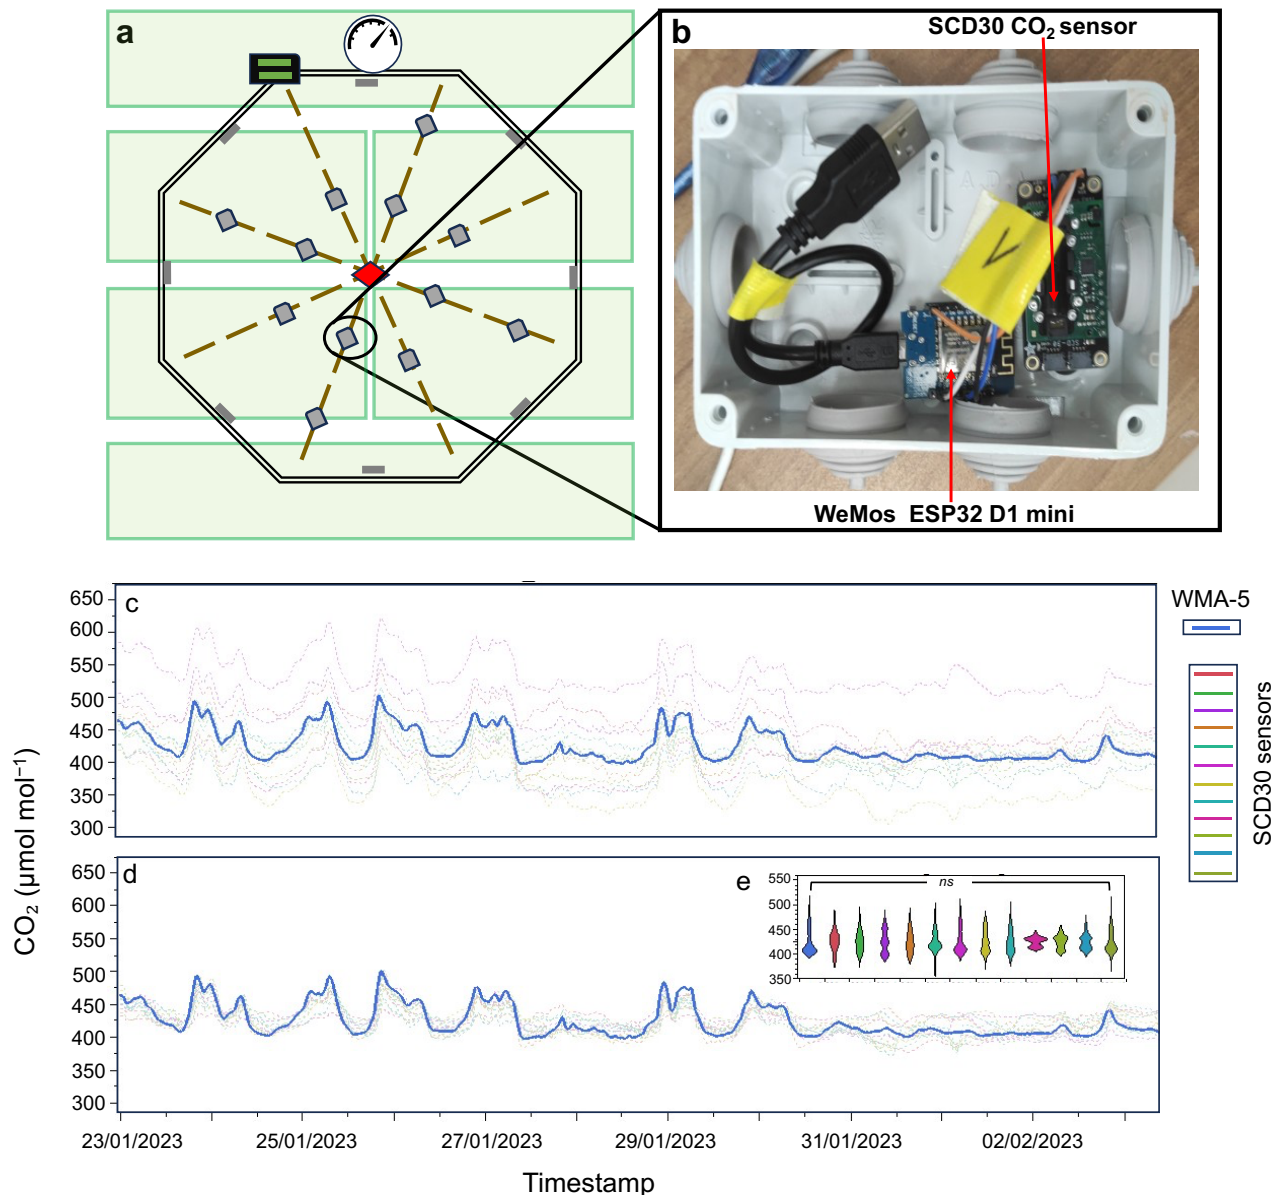

152

153 Figure S4 (a) Schematics of a [CO<sub>2</sub>]-enriched octagonal ring showing the spatial distribution of (b)  
 154 low-cost [CO<sub>2</sub>] sensors built at our lab and placed at the top of the canopy, 1 m above the ground,  
 155 across the ring area. (c) [CO<sub>2</sub>] readings from the SCD30 sensors before onsite-calibration with the  
 156 high-end WMA-5 PP system CO<sub>2</sub> analyzer. (d) [CO<sub>2</sub>] readings after on-site calibration with the  
 157 WMA-5 PP system CO<sub>2</sub> analyzer using a linear calibration function for each sensor. (e) Insert  
 158 showing Dunnett's test between all calibrated SCD30 sensors against the WMA-5 PP system CO<sub>2</sub>  
 159 analyzer reading, showing no significant differences at  $p < 0.05$  between the sensors after  
 160 calibration for the entire period before enrichment.

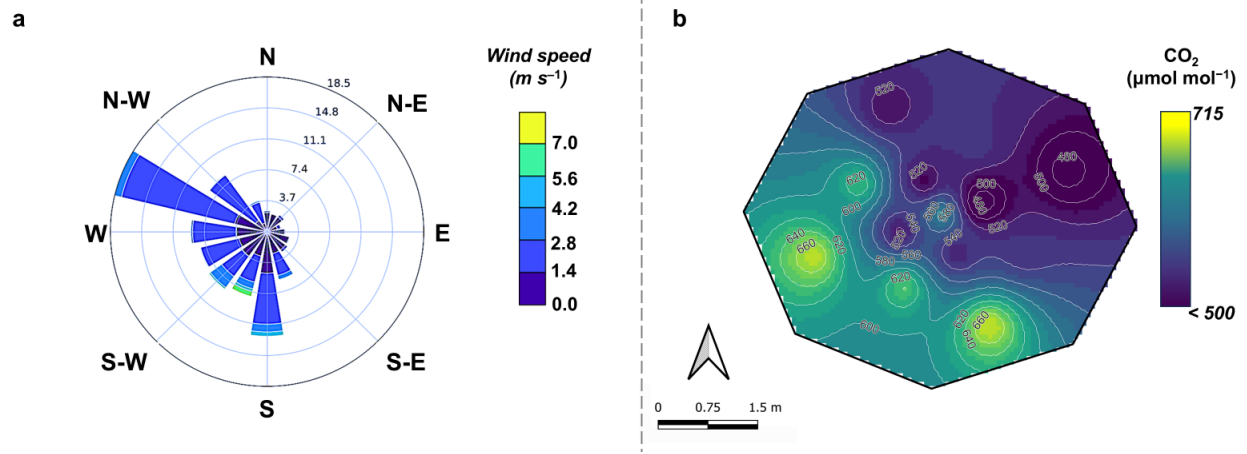

161

162 Figure S5. (a) Windrose representation of the mean wind speed ( $\text{m s}^{-1}$ ) and directions ( $^{\circ}$ ) and (b)  
 163 interpolated spatial distribution of the mean  $[\text{CO}_2]$  within a single  $[\text{CO}_2]$ -enriched octagonal ring  
 164 for the active enrichment period.

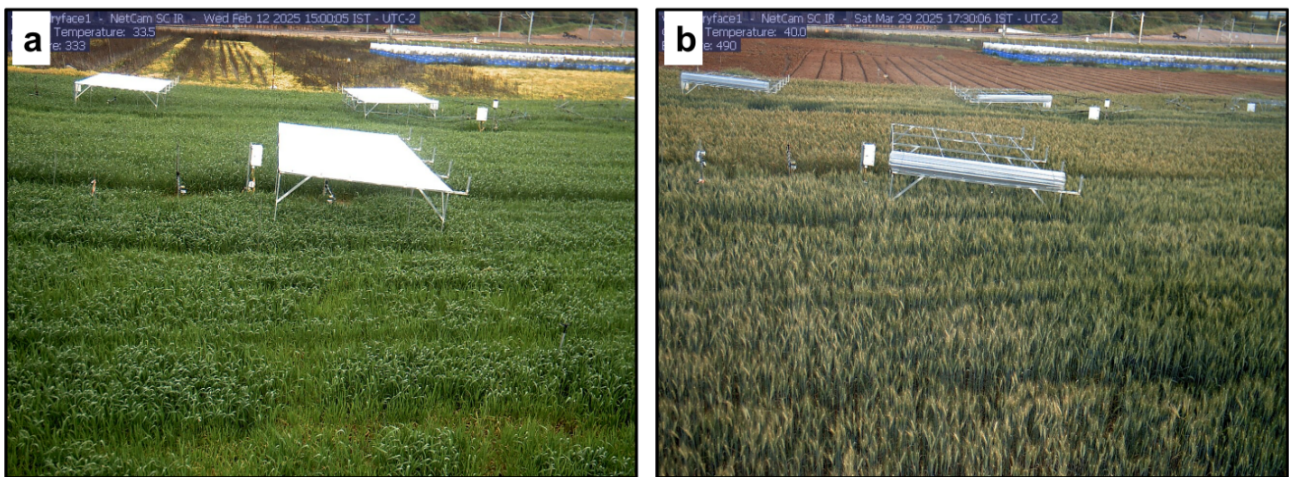

165

166 Figure S6. Retractable rain-exclusion system used at the WheatDryFACE facility. (a) PhenoCam  
 167 image showing a rain-exclusion shelter deployed above the wheat canopy during a rainfall event.  
 168 (b) The same shelter in its retracted position under non-rain conditions. Both images were captured  
 169 by the field-installed PhenoCam cameras.

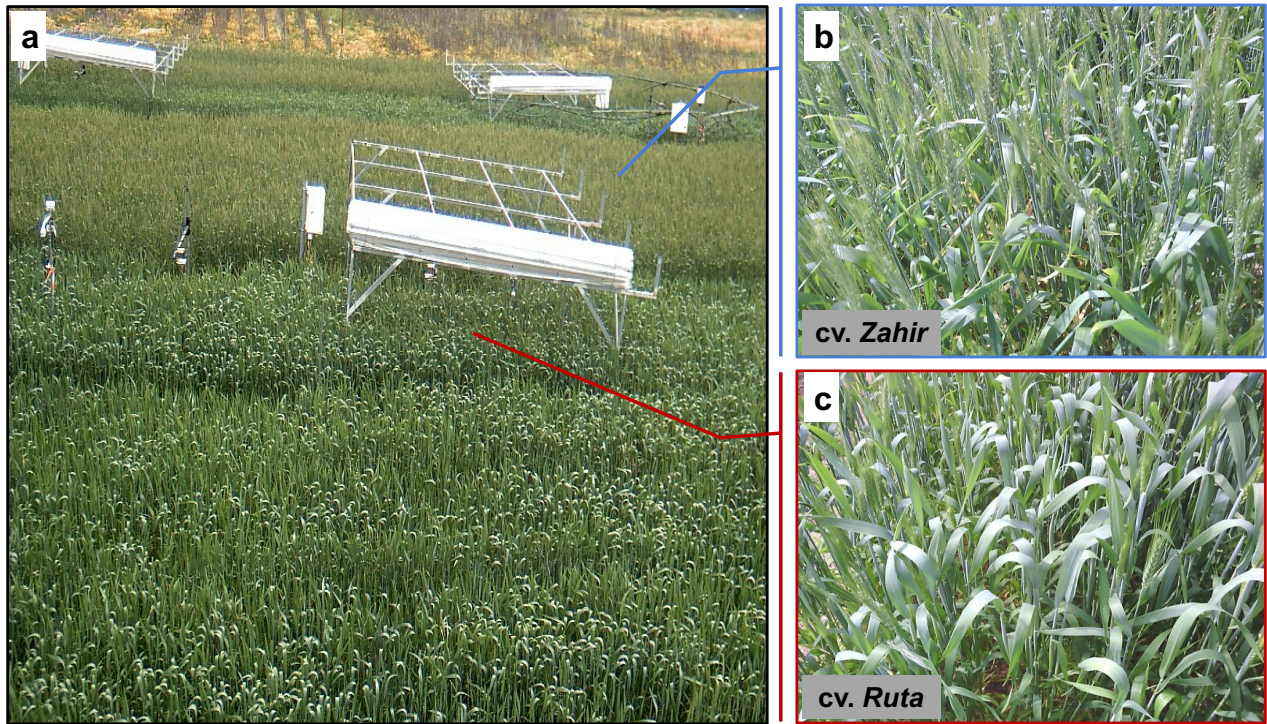

170

171 Figure S7. Representative field images of the two wheat genotypes used in the experiment. (a)  
 172 Field view showing adjacent plots of the two cultivars. Close-up pictures of (b) *cv. Zahir* at DC65  
 173 (anthesis) and (c) *cv. Ruta* at DC52 (heading). Images were acquired on the same day (4 March  
 174 2025) and illustrate the contrasting phenological development of the two cultivars.

175

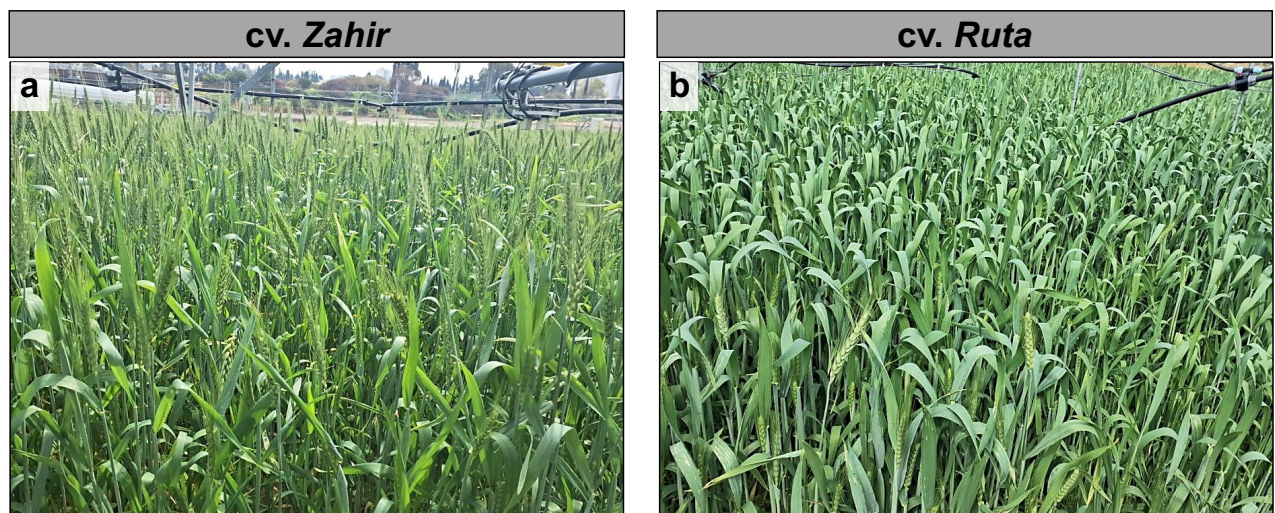

176

177 Figure S8. A closer look at the color and structural differences among the two genotypes (a) *cv.*  
 178 *Zahir* and (b) *cv. Ruta*. Images were taken on the same day (4 March 2025).

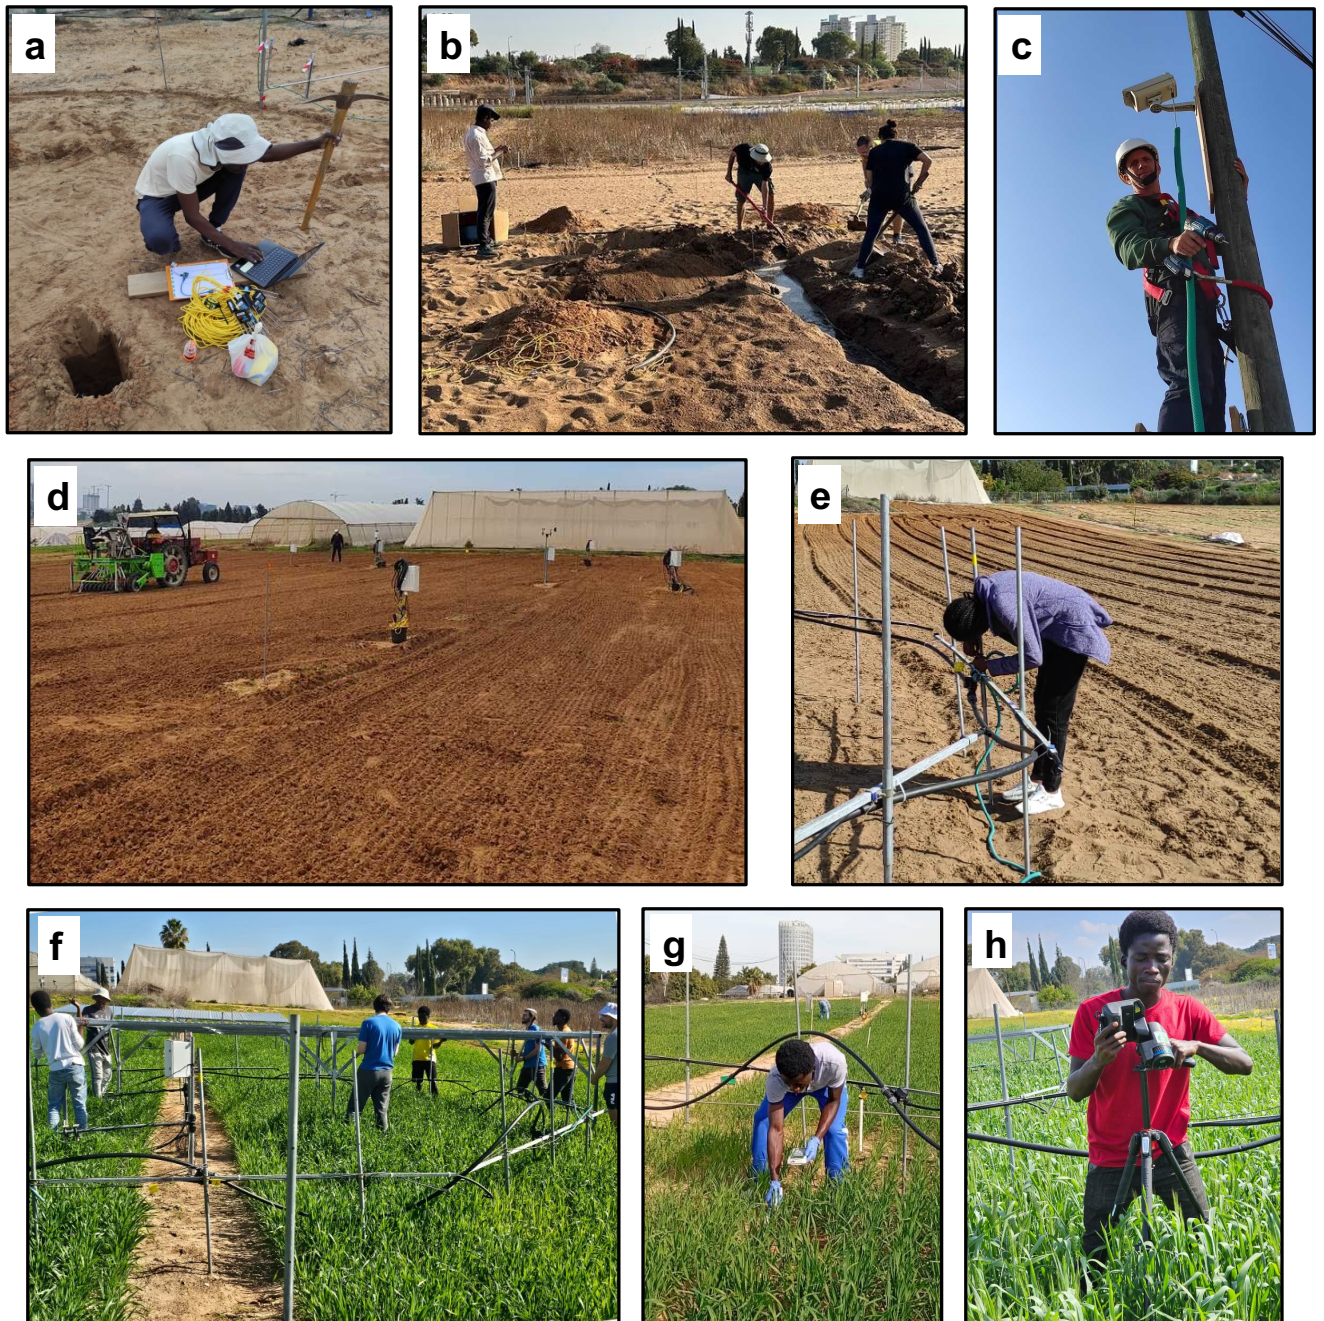

179

180 Figure S9. Field preparation, installation, and operation of the WheatDryFACE facility. (a–h)  
 181 Representative photographs of team members establishing and operating the facility. Panels show  
 182 (a) TDR sensor installation and system setup, (b) trenching and underground infrastructure  
 183 preparation, (c) installation of the PhenoCam cameras (Mr. Gil Lerner – lab technician), (d)  
 184 sowing with mechanical planter, (e) assembly and adjustment of FACE ring, (f) rain exclusion  
 185 shelter installation during the growing season, and in-season (g) *LAI* data collection and (h)  
 186 thermal imaging taken by Emmanuel Tamata (MSc).

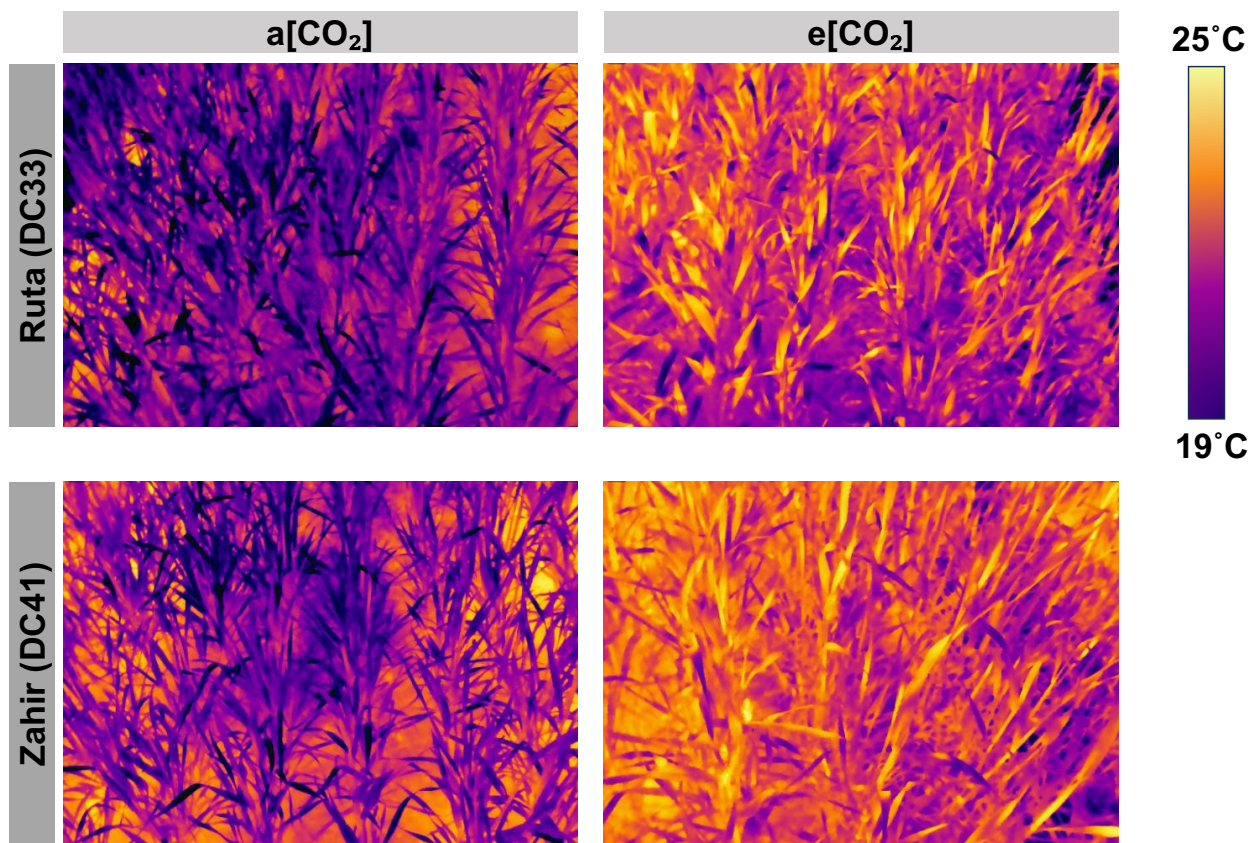

187

188 Figure S10. Thermal images from the FLIR T560 of cv. *Ruta* (DC33) and cv. *Zahir* (DC41) plants  
 189 taken on the same date and hour (22 January 2024, corresponding to DAS 57) in ambient (aCO<sub>2</sub>)  
 190 and [CO<sub>2</sub>]-enriched plots, showing substantially warmer leaves under elevated [CO<sub>2</sub>]. Colors  
 191 indicate the canopy's surface temperature. All values are given in °C.

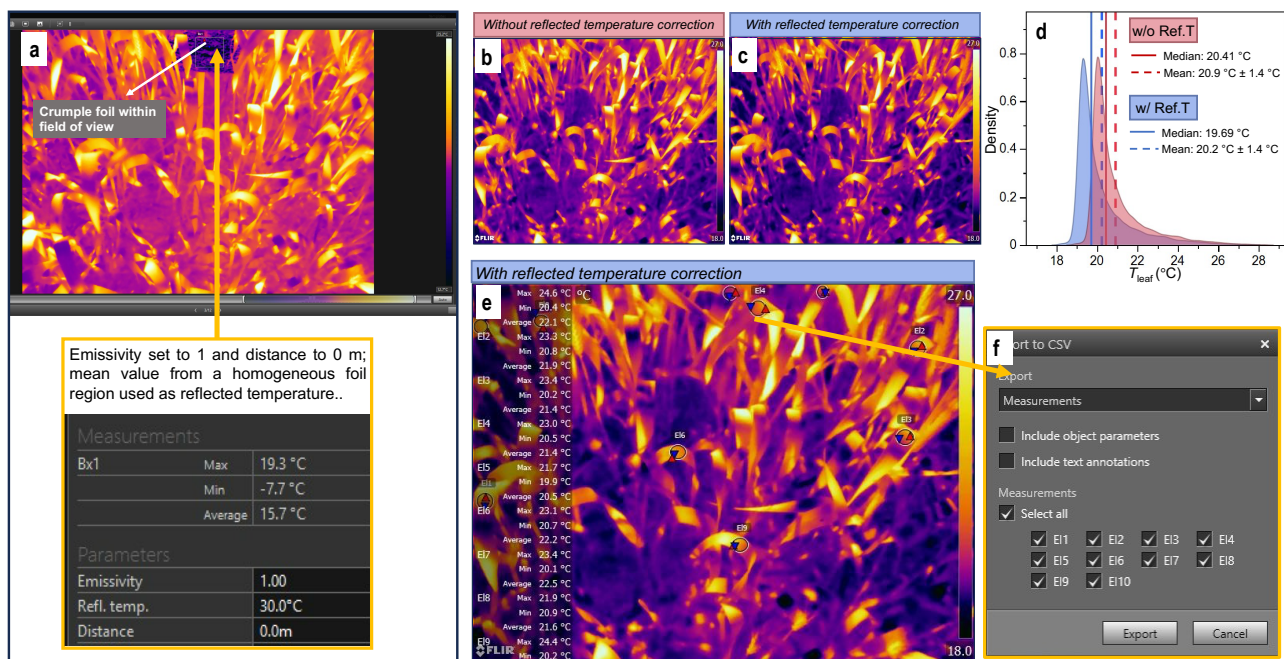

192  
 193 Figure S11. Thermal image processing workflow, including correction of reflected apparent  
 194 temperature using the crumpled aluminum foil method. (a) Thermal image showing placement of  
 195 crumpled aluminum foil within the field of view. Emissivity was set to 1 and distance to 0 m, and  
 196 the mean temperature of a homogeneous foil region was used as reflected apparent temperature.  
 197 (b) Thermal image processed without reflected temperature correction. (c, e) Thermal images  
 198 processed with reflected temperature correction applied. (d) Distribution of leaf temperature ( $T_{leaf}$ )  
 199 values extracted from the whole images with (blue) and without (red) reflected temperature  
 200 correction. Vertical lines indicate median (solid) and mean (dashed;  $\pm$  SD) values. (e) Extraction  
 201 of sunlit region-of-interest using ellipse polygon across 10 flag-leaf from the corrected thermal  
 202 image. (f) final export of  $T_{leaf}$  as csv for onward data analysis.

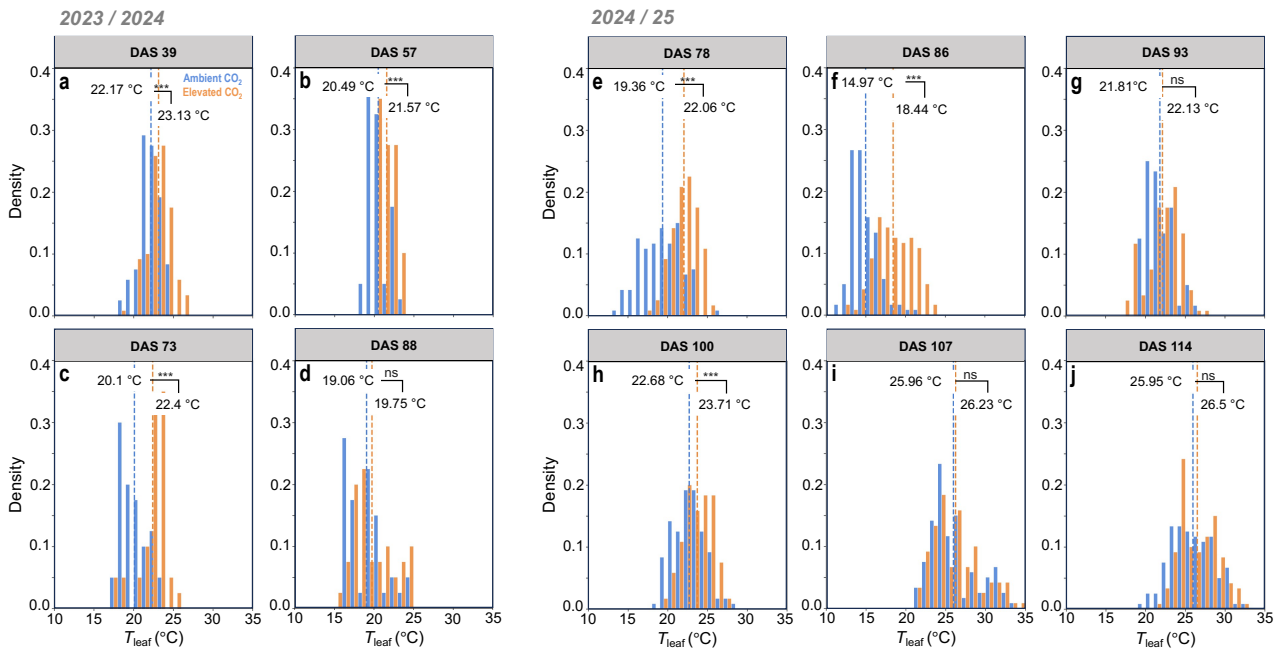

203

204 Figure S12. Density distributions of leaf temperature ( $T_{\text{leaf}}$ ) under ambient (blue) and elevated  
 205 (orange) [ $\text{CO}_2$ ] for (a–d) *Season 1* (2023/24) and (e–j) *Season 2* (2024/25) across developmental  
 206 stages (days after sowing, DAS). Vertical dashed lines indicate treatment means. Elevated [ $\text{CO}_2$ ]  
 207 generally resulted in higher canopy temperatures, with variability across developmental stages.  
 208 Asterisks denote significant differences between  $\text{CO}_2$  treatments (two-tailed  $t$ -test: \*\*\*  $p < 0.001$ ),  
 209 while non-significant differences are indicated as “ns”.

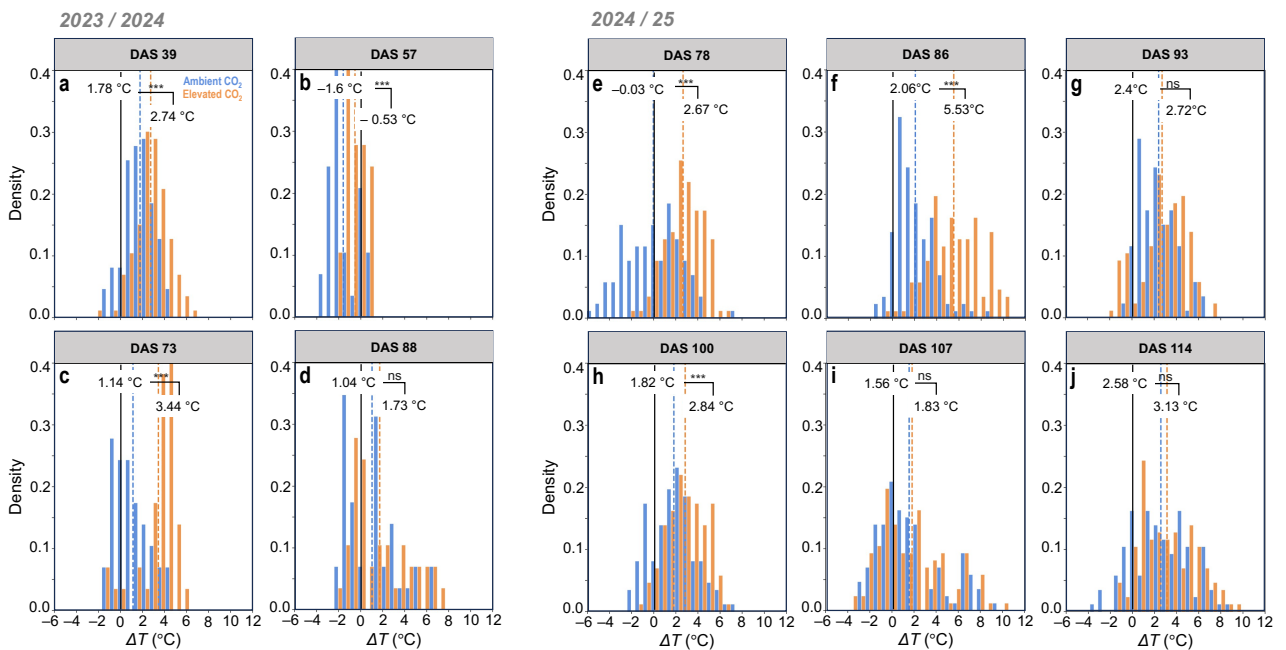

210

211 Figure S13. Same as Fig. S12 but for  $\Delta T$ .

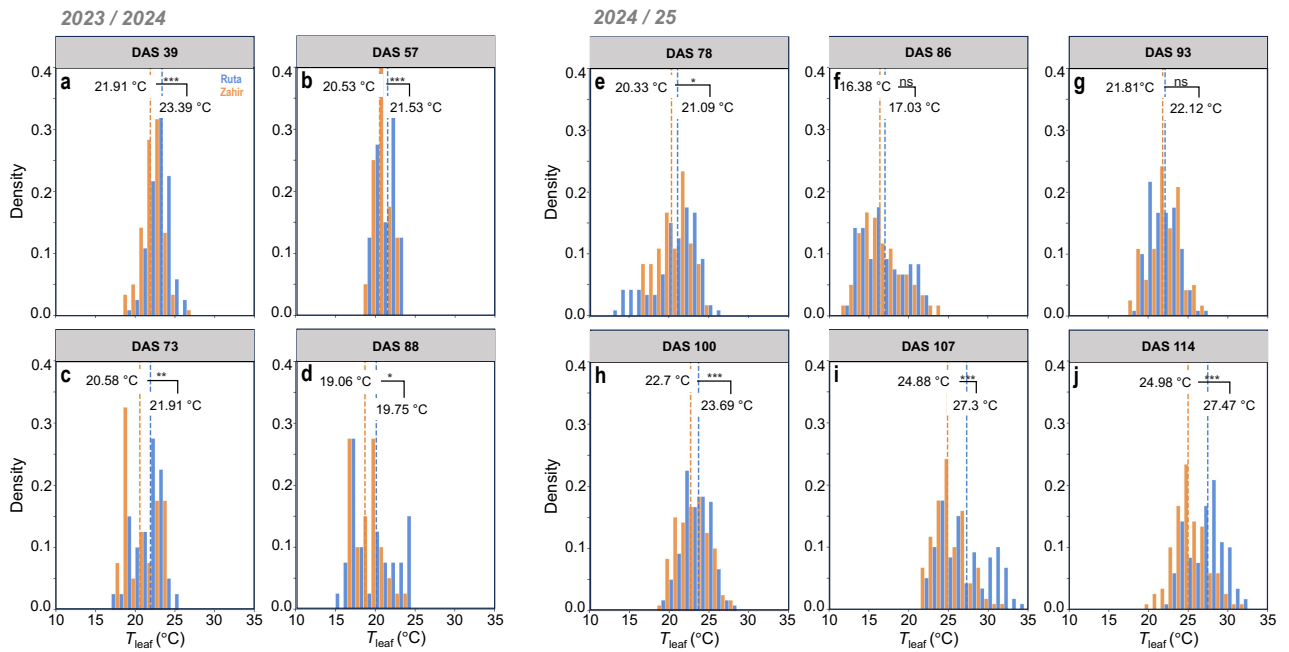

212

213 Figure S14. Density distributions of leaf temperature ( $T_{leaf}$ ) for the two genotypes, *cv. Ruta* (blue)  
 214 and *cv. Zahir* (orange), across developmental stages (days after sowing, DAS) for (a–d) *Season 1*  
 215 (2023/24) and (e–j) *Season 2* (2024/25). Vertical dashed lines indicate the means. Differences  
 216 between genotypes varied across developmental stages, with *cv. Ruta* generally exhibiting higher  
 217  $T_{leaf}$  than *cv. Zahir* at later stages. Asterisks denote significant differences between genotypes (two-  
 218 tailed  $t$ -test: \*\*\*  $p < 0.001$ , \*\*  $p < 0.01$ , and \*  $p < 0.05$ ), while non-significant differences are indicated  
 219 as “ns”.

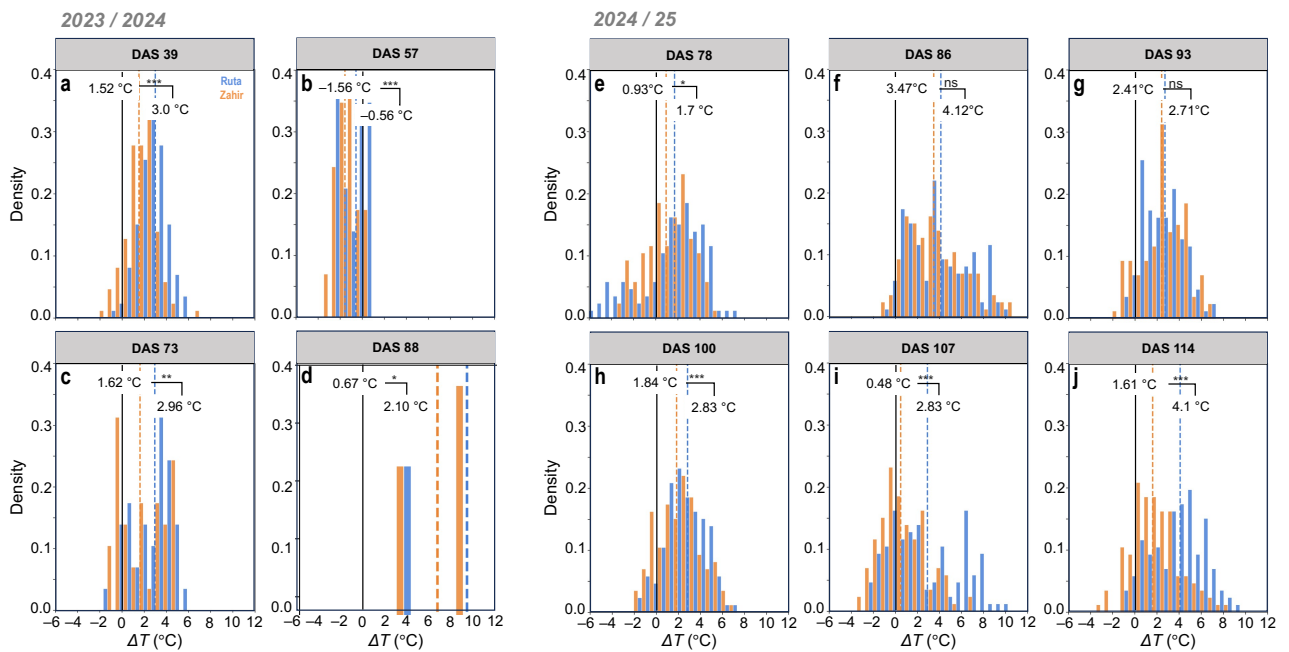

220

221 Figure S15. Same as Figure S14 but for  $\Delta T$ .

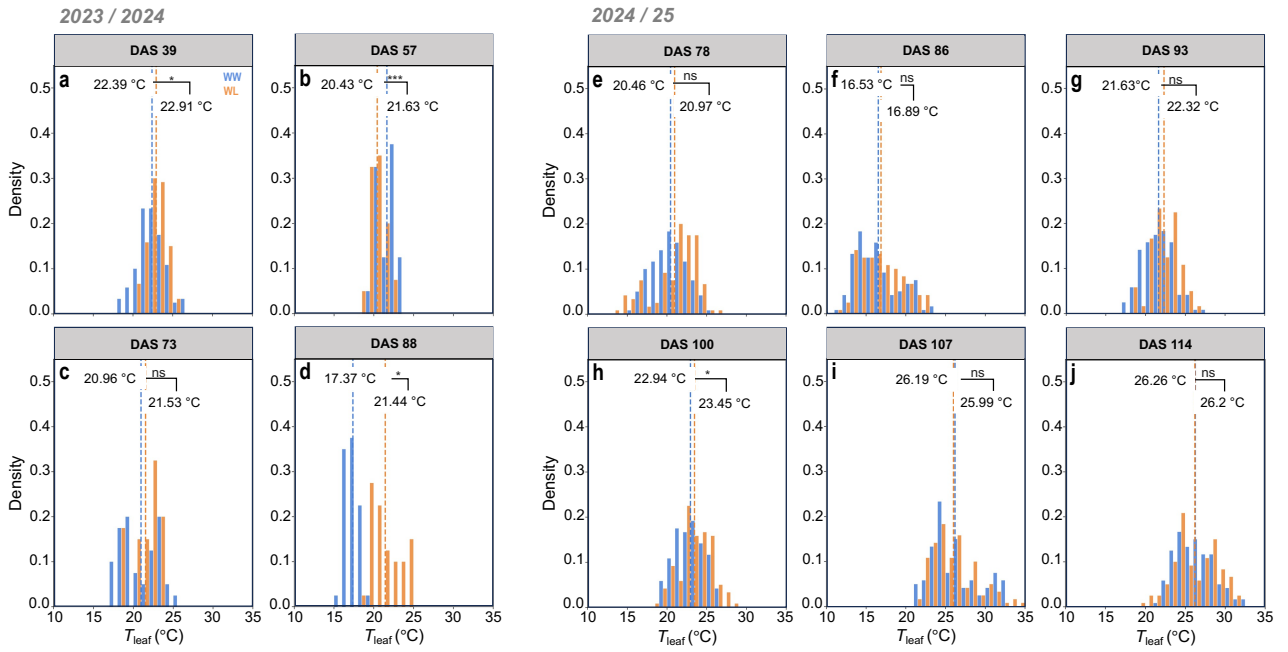

222

223 Figure S16. Density distributions of leaf temperature ( $T_{leaf}$ ) under well-watered (WW, blue) and  
 224 water-limited (WL, orange) conditions across developmental stages (days after sowing, DAS) for  
 225 (a–d) *Season 1* (2023/24) and (e–j) *Season 2* (2024/25). Vertical dashed lines indicate treatment  
 226 means. Differences between water treatments varied across developmental stages, with variability  
 227 in both magnitude and direction, with generally higher  $T_{leaf}$  under water-limited conditions.  
 228 Asterisks denote significant differences between water treatments (two-tailed  $t$ -test: \*\*\*  $p < 0.001$ ,  
 229 \*\*  $p < 0.01$ , and \*  $p < 0.05$ ), while non-significant differences are indicated as “ns”.

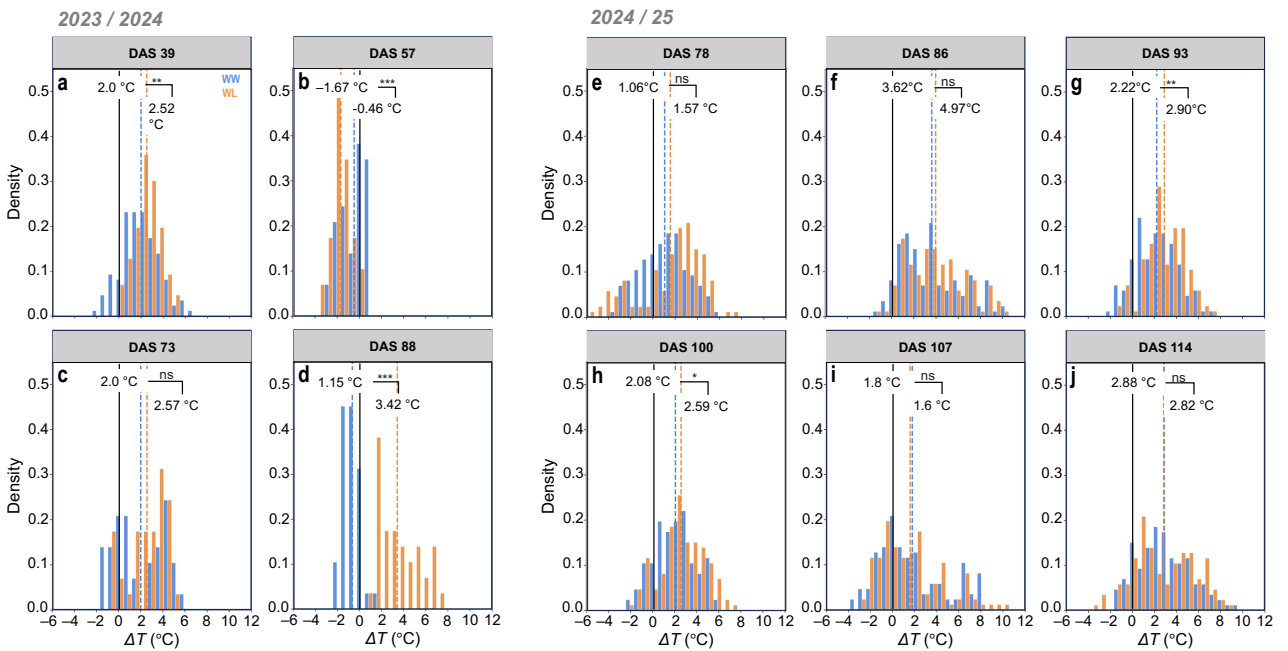

230

231 Figure S17. Same as Figure S16 but for  $\Delta T$ .

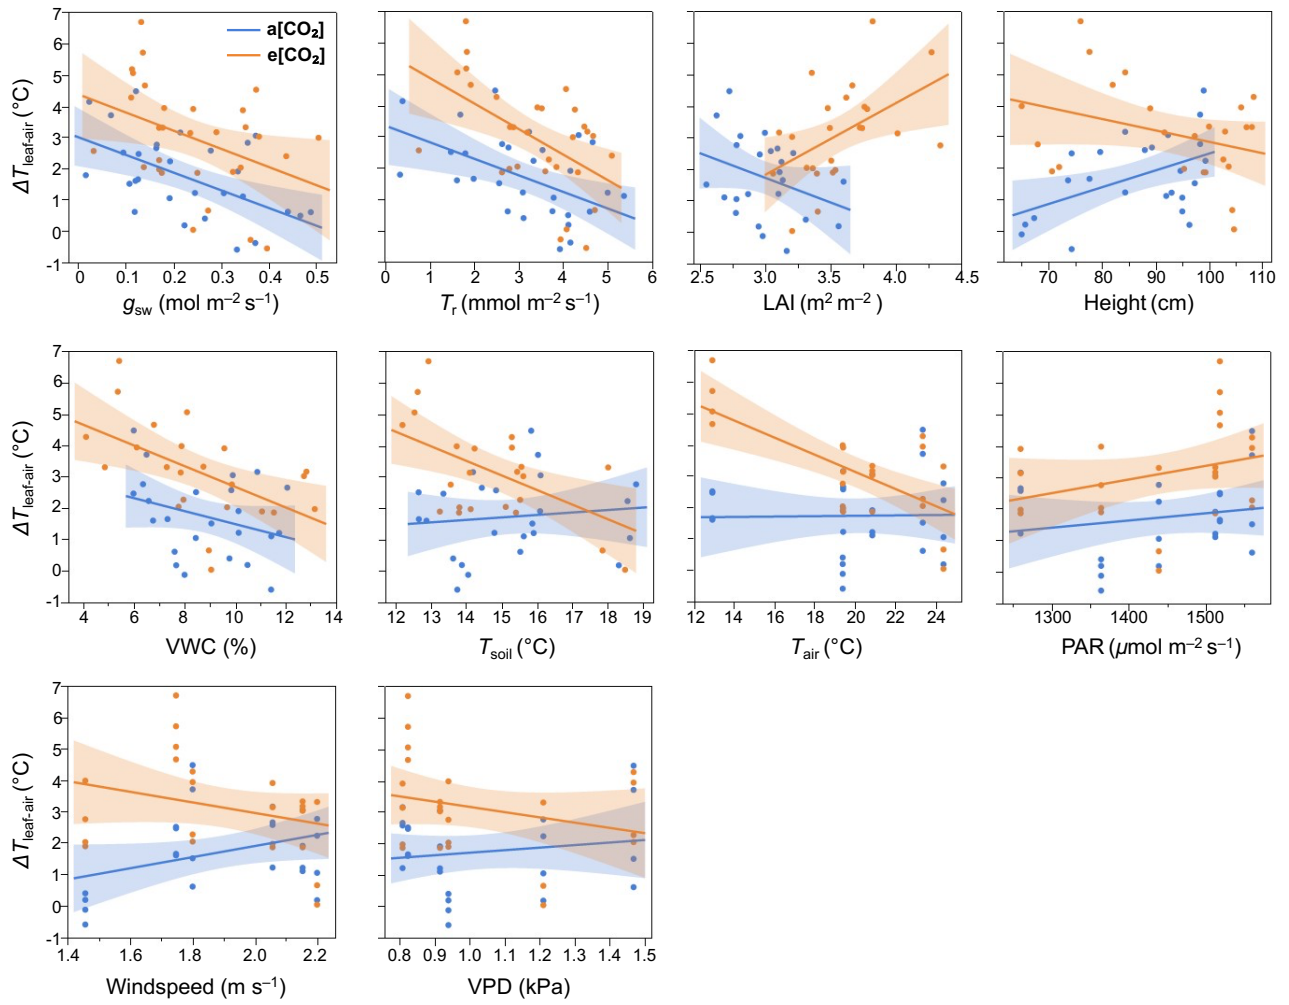

232

233 Figure S18. Scatter plots of plot-level  $\Delta T$  and key physiological, structural, and environmental  
 234 variables under ambient ( $a[\text{CO}_2]$ , blue) and elevated ( $e[\text{CO}_2]$ , orange)  $[\text{CO}_2]$  conditions. Solid lines  
 235 show fitted linear trends with shaded 95% confidence intervals.

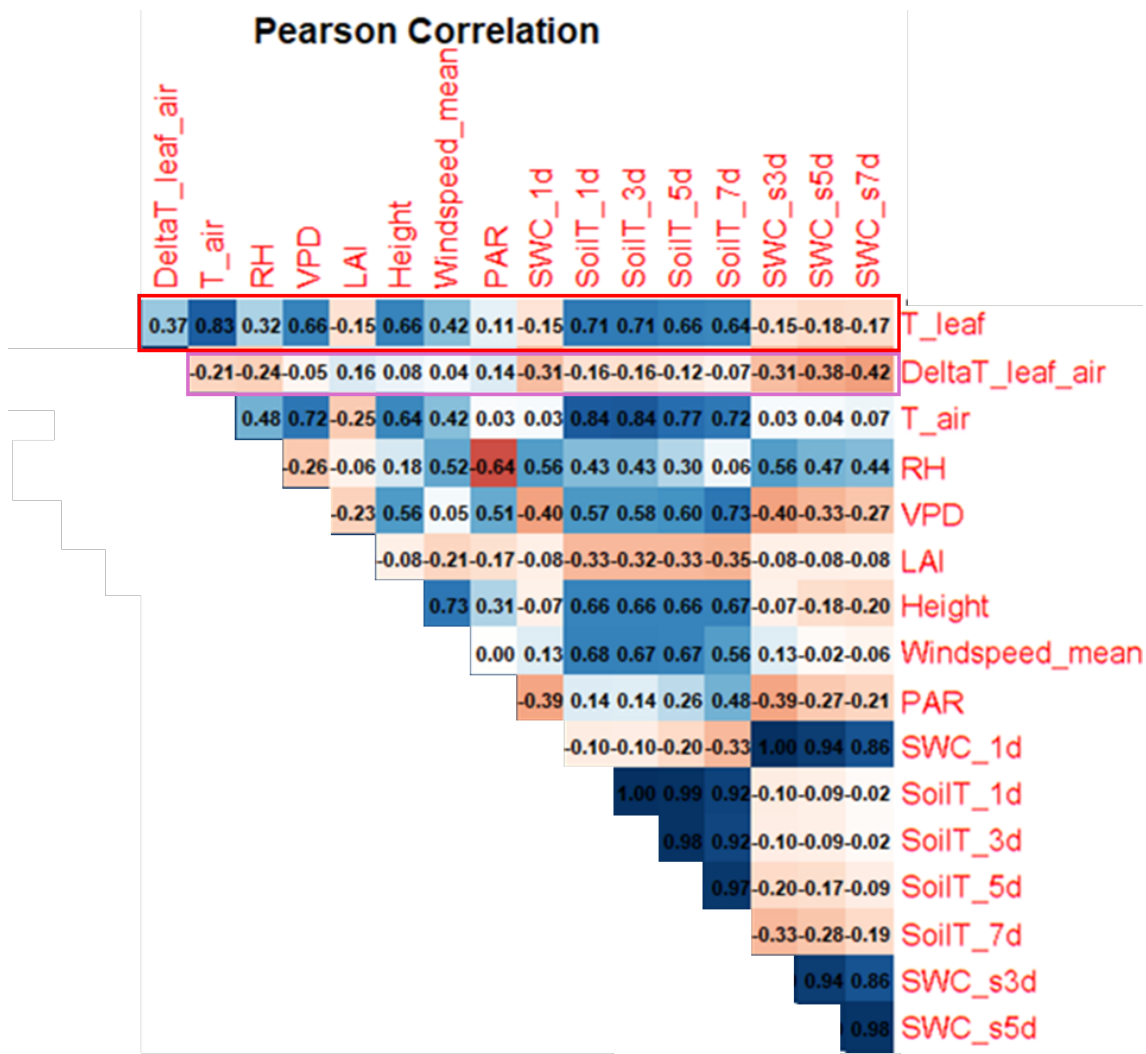

236

237 Figure S19. Pearson correlation matrix among  $\Delta T$  and environmental and structural variables in the  
 238 2024/5 dataset (*Season 2*). Colors indicate the strength and sign of the correlation (positive – blue  
 239 and negative – red), and the values shown in each cell represent the correlation coefficient. Positive  
 240 values indicate that variables increase together, whereas negative values indicate an inverse  
 241 relationship. The matrix shows broadly consistent associations among variables, with strong  
 242 intercorrelations among soil temperature and soil water content metrics across temporal scales (1d  
 243 = same-day measurements; 3d, 5d, and 7d = mean values calculated over the respective periods of  
 244 3, 5, and 7 days preceding the day on which  $\Delta T$  was measured). Red and purple outlines highlight  
 245 the matrix regions corresponding to pairwise relationships with  $\Delta T$  variables.

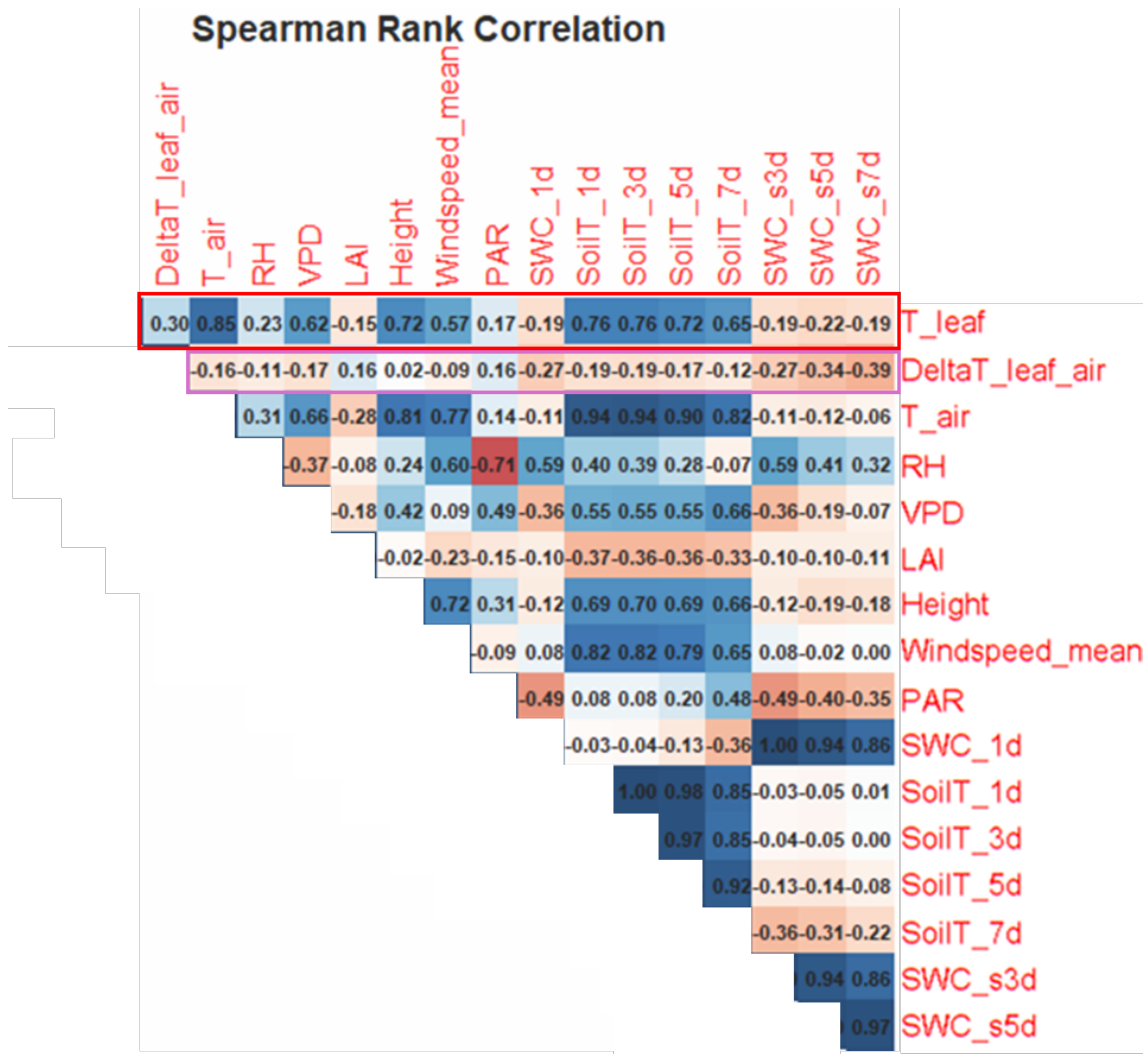

246

247 Figure S20. Same as in Figure S19, but for Spearman's rank correlation.

248 **Supplementary Tables**

249 Table S1. Meteorological conditions per season, including well-watered (WW) and limited-watered  
 250 (WL) plots.  $R_g$  is global incoming radiation.

| Season | $RH$ (%) | $T_{\text{air}}$ (°C) | $VPD$ (kPa) | WW (mm) | WL (mm) | $ws$ (m s <sup>-1</sup> ) | $R_g$ (W m <sup>-2</sup> day <sup>-1</sup> ) |
|--------|----------|-----------------------|-------------|---------|---------|---------------------------|----------------------------------------------|
| 2023/4 | 75 ± 16  | 15.2 ± 3.6            | 0.50 ± 0.43 | 464     | 323     | 1.21 ± 1.14               | 3200 ± 1082                                  |
| 2024/5 | 68 ± 12  | 15.5 ± 3.4            | 0.67 ± 0.41 | 403     | 372     | 1.11 ± 0.55               | 4246 ± 1605                                  |

251

252 Table S2. Corresponding Zadok decimal codes to days after sowing per genotype for cv. *Ruta* and  
 253 cv. *Zahir*.

| Season | DAS | Zadok decimal code (DC) |                  |
|--------|-----|-------------------------|------------------|
|        |     | cv. <i>Ruta</i>         | cv. <i>Zahir</i> |
| 2023/4 | 39  | DC23                    | DC32             |
|        | 57  | DC33                    | DC41             |
|        | 73  | DC41                    | DC55             |
|        | 88  | DC52                    | DC62             |
| 2024/5 | 78  | DC37                    | DC55             |
|        | 86  | DC43                    | DC62             |
|        | 93  | DC52                    | DC65             |
|        | 100 | DC62                    | DC68             |
|        | 107 | DC65                    | DC77             |
|        | 114 | DC71                    | DC85             |

254

255

256 Table S3. The 41 sequential  $\Delta T$  models.

| Model   | Variables included                                                                                                                                                           |
|---------|------------------------------------------------------------------------------------------------------------------------------------------------------------------------------|
| B       | Baseline                                                                                                                                                                     |
| I       | B + $g_{sw}$ (mol m <sup>-2</sup> s <sup>-1</sup> )                                                                                                                          |
| ii      | B + LAI (m <sup>2</sup> m <sup>-2</sup> )                                                                                                                                    |
| iii     | B + height (cm)                                                                                                                                                              |
| iv      | B + $T_{soil}$ (°C)                                                                                                                                                          |
| v       | B + $g_{sw}$ + [ $g_{sw} \times VPD$ ]                                                                                                                                       |
| vi      | B + $g_{sw}$ + [ $g_{sw} \times VPD$ ] + LAI                                                                                                                                 |
| vii     | B + $g_{sw}$ + [ $g_{sw} \times VPD$ ] + LAI + height                                                                                                                        |
| viii    | B + $g_{sw}$ + [ $g_{sw} \times VPD$ ] + LAI + height + $T_{soil}$                                                                                                           |
| ix      | B + $g_{sw}$ + [ $g_{sw} \times VPD$ ] + [ $CO_2 \times g_{sw}$ ]                                                                                                            |
| x       | B + $g_{sw}$ + [ $g_{sw} \times VPD$ ] + [ $CO_2 \times g_{sw}$ ] + LAI                                                                                                      |
| xi      | B + $g_{sw}$ + [ $g_{sw} \times VPD$ ] + [ $CO_2 \times g_{sw}$ ] + LAI + height                                                                                             |
| xii     | B + $g_{sw}$ + [ $g_{sw} \times VPD$ ] + [ $CO_2 \times g_{sw}$ ] + LAI + height + $T_{soil}$                                                                                |
| xiii    | B + $g_{sw}$ + [ $CO_2 \times g_{sw}$ ]                                                                                                                                      |
| xiv     | B + $g_{sw}$ + [ $CO_2 \times g_{sw}$ ] + LAI                                                                                                                                |
| xv      | B + $g_{sw}$ + [ $CO_2 \times g_{sw}$ ] + LAI + height                                                                                                                       |
| xvi     | B + $g_{sw}$ + [ $CO_2 \times g_{sw}$ ] + LAI + height + $T_{soil}$                                                                                                          |
| xvii    | B + $g_{sw}$ + [ $CO_2 \times g_{sw}$ ] + LAI + [ $CO_2 \times LAI$ ]                                                                                                        |
| xviii   | B + $g_{sw}$ + [ $CO_2 \times g_{sw}$ ] + LAI + [ $CO_2 \times LAI$ ] + height                                                                                               |
| xix     | B + $g_{sw}$ + [ $CO_2 \times g_{sw}$ ] + LAI + [ $CO_2 \times LAI$ ] + height + [ $CO_2 \times height$ ]                                                                    |
| xx      | B + $g_{sw}$ + [ $CO_2 \times g_{sw}$ ] + LAI + [ $CO_2 \times LAI$ ] + height + [ $CO_2 \times height$ ] + $T_{soil}$                                                       |
| xxi     | B + $g_{sw}$ + [ $CO_2 \times g_{sw}$ ] + LAI + [ $CO_2 \times LAI$ ] + height + [ $CO_2 \times height$ ] + $T_{soil}$ + [ $LAI \times T_{soil}$ ]                           |
| xxii    | B + $g_{sw}$ + LAI + [ $CO_2 \times LAI$ ]                                                                                                                                   |
| xxiii   | B + $g_{sw}$ + LAI + [ $CO_2 \times LAI$ ] + height                                                                                                                          |
| xxiv    | B + $g_{sw}$ + LAI + [ $CO_2 \times LAI$ ] + height + $T_{soil}$                                                                                                             |
| xxv     | B + $g_{sw}$ + LAI + [ $CO_2 \times LAI$ ] + height + $T_{soil}$ + [ $LAI \times T_{soil}$ ]                                                                                 |
| xxvi    | B + $g_{sw}$ + [ $g_{sw} \times VPD$ ] + LAI + [ $CO_2 \times LAI$ ]                                                                                                         |
| xxvii   | B + $g_{sw}$ + [ $g_{sw} \times VPD$ ] + LAI + [ $CO_2 \times LAI$ ] + height                                                                                                |
| xxviii  | B + $g_{sw}$ + [ $g_{sw} \times VPD$ ] + LAI + [ $CO_2 \times LAI$ ] + height + $T_{soil}$                                                                                   |
| xxix    | B + $g_{sw}$ + [ $g_{sw} \times VPD$ ] + LAI + [ $CO_2 \times LAI$ ] + height + $T_{soil}$ + [ $LAI \times T_{soil}$ ]                                                       |
| xxx     | B + $g_{sw}$ + LAI + height + [ $CO_2 \times LAI$ ] + [ $CO_2 \times height$ ]                                                                                               |
| xxxi    | B + $g_{sw}$ + LAI + height + [ $CO_2 \times LAI$ ] + [ $CO_2 \times height$ ] + $T_{soil}$                                                                                  |
| xxxii   | B + $g_{sw}$ + LAI + height + [ $CO_2 \times LAI$ ] + [ $CO_2 \times height$ ] + $T_{soil}$ + [ $LAI \times T_{soil}$ ]                                                      |
| xxxiii  | B + $g_{sw}$ + [ $g_{sw} \times VPD$ ] + LAI + [ $CO_2 \times LAI$ ] + height + [ $CO_2 \times height$ ]                                                                     |
| xxxiv   | B + $g_{sw}$ + [ $g_{sw} \times VPD$ ] + LAI + [ $CO_2 \times LAI$ ] + height + [ $CO_2 \times height$ ] + $T_{soil}$                                                        |
| xxxv    | B + $g_{sw}$ + [ $g_{sw} \times VPD$ ] + LAI + [ $CO_2 \times LAI$ ] + height + [ $CO_2 \times height$ ] + $T_{soil}$ + [ $LAI \times T_{soil}$ ]                            |
| xxxvi   | B + $g_{sw}$ + [ $CO_2 \times g_{sw}$ ] + [ $g_{sw} \times VPD$ ] + LAI + [ $CO_2 \times LAI$ ]                                                                              |
| xxxvii  | B + $g_{sw}$ + [ $CO_2 \times g_{sw}$ ] + [ $g_{sw} \times VPD$ ] + LAI + [ $CO_2 \times LAI$ ] + height                                                                     |
| xxxviii | B + $g_{sw}$ + [ $CO_2 \times g_{sw}$ ] + [ $g_{sw} \times VPD$ ] + LAI + [ $CO_2 \times LAI$ ] + height + $T_{soil}$                                                        |
| xxxix   | B + $g_{sw}$ + [ $CO_2 \times g_{sw}$ ] + [ $g_{sw} \times VPD$ ] + LAI + [ $CO_2 \times LAI$ ] + height + $T_{soil}$ + [ $LAI \times T_{soil}$ ]                            |
| xxxx    | B + $g_{sw}$ + [ $CO_2 \times g_{sw}$ ] + [ $g_{sw} \times VPD$ ] + LAI + [ $CO_2 \times LAI$ ] + height + [ $CO_2 \times height$ ] + $T_{soil}$ + [ $LAI \times T_{soil}$ ] |

257 Table S4. Statistics of the 41-step sequential  $\Delta T$  modelling. Directional ( $\beta$ ) and nonlinear ( $\gamma$ )  
 258 coefficients represent the linear and quadratic terms, respectively, within the modelling framework.  
 259 In red are the statistically significant coefficients ( $p < 0.05$ ), while bold italics denote marginal  
 260 significance ( $0.05 \leq p < 0.10$ ). B is the baseline model and models  $i$ - $xxxx$  correspond to the models  
 261 presented in Table S3.

| Model          | $\beta_{CO_2}$ | AICc  | R <sup>2</sup> | R <sup>2</sup> adj | RMSE | $\beta_{gsw}$ | $\beta_{LAI}$ | $\beta_{height}$ | $\beta_{Tsoil}$ | $\gamma_{gsw}$ | $\gamma_{LAI}$ | $\gamma_{height}$ | $\gamma_{Tsoil}$ |
|----------------|----------------|-------|----------------|--------------------|------|---------------|---------------|------------------|-----------------|----------------|----------------|-------------------|------------------|
| B              | 0.52           | 374.7 | 0.38           | 0.31               | 1.77 |               |               |                  |                 |                |                |                   |                  |
| <i>i</i>       | 0.52           | 323.3 | 0.47           | 0.40               | 1.60 | -0.43         |               |                  |                 | 0.10           |                |                   |                  |
| <i>ii</i>      | 0.54           | 326.3 | 0.48           | 0.40               | 1.58 | -0.40         | 0.01          |                  |                 | 0.09           | 0.09           |                   |                  |
| <i>iii</i>     | 0.58           | 326.0 | 0.50           | 0.42               | 1.55 | -0.36         | 0             | 0.22             |                 | 0.05           | 0.07           | -0.29             |                  |
| <i>iv</i>      | 0.49           | 327.7 | 0.52           | 0.43               | 1.52 | -0.35         | 0.01          | 0.29             | -0.04           | 0.06           | 0.07           | <b>-0.25</b>      | <b>0.27</b>      |
| <i>v</i>       | 0.52           | 325.9 | 0.47           | 0.39               | 1.60 | -0.42         |               |                  |                 | 0.10           |                |                   |                  |
| <i>vi</i>      | 0.54           | 329.0 | 0.48           | 0.40               | 1.58 | -0.39         | 0.01          |                  |                 | 0.08           | 0.09           |                   |                  |
| <i>vii</i>     | 0.58           | 328.9 | 0.50           | 0.41               | 1.55 | -0.35         | -0.01         | 0.22             |                 | 0.05           | 0.07           | -0.29             |                  |
| <i>viii</i>    | 0.49           | 330.7 | 0.52           | 0.42               | 1.52 | -0.35         | 0.01          | 0.30             | -0.04           | 0.06           | 0.07           | <b>-0.25</b>      | <b>0.27</b>      |
| <i>ix</i>      | 0.53           | 327.0 | 0.48           | 0.40               | 1.59 | -0.35         |               |                  |                 | 0.10           |                |                   |                  |
| <i>x</i>       | 0.57           | 329.9 | 0.49           | 0.40               | 1.57 | -0.31         | -0.01         |                  |                 | 0.08           | 0.09           |                   |                  |
| <i>xi</i>      | 0.64           | 328.8 | 0.51           | 0.42               | 1.53 | <b>-0.24</b>  | -0.02         | 0.16             |                 | 0.05           | 0.07           | -0.31             |                  |
| <i>xii</i>     | 0.56           | 331.3 | 0.53           | 0.43               | 1.51 | <b>-0.25</b>  | 0             | 0.24             | -0.03           | 0.06           | 0.07           | -0.27             | 0.25             |
| <i>xiii</i>    | 0.53           | 324.4 | 0.47           | 0.40               | 1.59 | -0.37         |               |                  |                 | 0.10           |                |                   |                  |
| <i>xiv</i>     | 0.57           | 327.2 | 0.49           | 0.40               | 1.57 | -0.32         | -0.01         |                  |                 | 0.09           | 0.09           |                   |                  |
| <i>xv</i>      | 0.64           | 326.0 | 0.51           | 0.42               | 1.53 | <b>-0.26</b>  | -0.02         | 0.17             |                 | 0.05           | 0.07           | -0.31             |                  |
| <i>xvi</i>     | 0.56           | 328.2 | 0.53           | 0.43               | 1.51 | <b>-0.25</b>  | 0             | 0.24             | -0.02           | 0.06           | 0.07           | -0.27             | <b>0.26</b>      |
| <i>xvii</i>    | 0.55           | 327.6 | 0.50           | 0.41               | 1.56 | -0.32         | -0.17         |                  |                 | 0.10           | 0.01           |                   |                  |
| <i>xviii</i>   | 0.59           | 326.3 | 0.52           | 0.43               | 1.52 | -0.26         | -0.20         | 0.25             |                 | 0.07           | -0.01          | -0.31             |                  |
| <i>xix</i>     | 0.62           | 323.6 | 0.54           | 0.45               | 1.48 | -0.32         | -0.16         | 0.39             |                 | 0.06           | 0.02           | -0.14             |                  |
| <i>xx</i>      | 0.56           | 328.0 | 0.55           | 0.45               | 1.47 | -0.31         | -0.13         | 0.42             | -0.01           | 0.06           | 0.03           | -0.13             | 0.18             |
| <i>xxi</i>     | 0.56           | 331.2 | 0.55           | 0.44               | 1.47 | -0.31         | -0.11         | 0.42             | 0.02            | 0.06           | 0.04           | -0.14             | 0.20             |
| <i>xxii</i>    | 0.52           | 327.1 | 0.49           | 0.40               | 1.57 | -0.41         | -0.13         |                  |                 | 0.10           | 0.02           |                   |                  |
| <i>xxiii</i>   | 0.53           | 326.7 | 0.51           | 0.42               | 1.54 | -0.37         | -0.17         | 0.30             |                 | 0.06           | 0              | -0.29             |                  |
| <i>xxiv</i>    | 0.47           | 329.2 | 0.52           | 0.43               | 1.52 | -0.35         | -0.12         | 0.36             | 0               | 0.07           | 0.01           | <b>-0.25</b>      | 0.25             |
| <i>xxv</i>     | 0.47           | 331.9 | 0.52           | 0.42               | 1.51 | -0.34         | -0.18         | 0.36             | -0.08           | 0.06           | -0.01          | -0.21             | 0.20             |
| <i>xxvi</i>    | 0.52           | 330.0 | 0.49           | 0.40               | 1.57 | -0.40         | -0.13         |                  |                 | 0.09           | 0.02           |                   |                  |
| <i>xxvii</i>   | 0.53           | 329.7 | 0.51           | 0.42               | 1.54 | -0.36         | -0.17         | 0.30             |                 | 0.06           | 0              | -0.29             |                  |
| <i>xxviii</i>  | 0.47           | 332.3 | 0.52           | 0.42               | 1.52 | -0.36         | -0.13         | 0.36             | 0.01            | 0.07           | 0.01           | <b>-0.24</b>      | 0.25             |
| <i>xxix</i>    | 0.47           | 335.1 | 0.52           | 0.42               | 1.51 | -0.34         | -0.18         | 0.36             | -0.07           | 0.06           | -0.01          | -0.21             | 0.20             |
| <i>xxx</i>     | 0.57           | 323.2 | 0.53           | 0.44               | 1.5  | -0.42         | -0.13         | 0.44             |                 | 0.05           | 0.03           | -0.11             |                  |
| <i>xxxi</i>    | 0.51           | 327.2 | 0.54           | 0.44               | 1.49 | -0.40         | -0.10         | 0.47             | -0.04           | 0.06           | 0.04           | -0.10             | 0.19             |
| <i>xxxii</i>   | 0.51           | 330.3 | 0.54           | 0.44               | 1.49 | -0.41         | -0.09         | 0.47             | -0.02           | 0.06           | 0.04           | -0.10             | 0.20             |
| <i>xxxiii</i>  | 0.57           | 326.1 | 0.53           | 0.44               | 1.5  | -0.41         | -0.13         | 0.44             |                 | 0.05           | 0.03           | -0.11             |                  |
| <i>xxxiv</i>   | 0.51           | 330.3 | 0.54           | 0.44               | 1.49 | -0.40         | -0.10         | 0.47             | -0.04           | 0.06           | 0.04           | -0.10             | 0.19             |
| <i>xxxv</i>    | 0.51           | 333.6 | 0.54           | 0.43               | 1.49 | -0.40         | -0.09         | 0.47             | -0.02           | 0.06           | 0.04           | -0.10             | 0.20             |
| <i>xxxvi</i>   | 0.55           | 330.4 | 0.50           | 0.41               | 1.56 | -0.30         | -0.17         |                  |                 | 0.10           | 0.01           |                   |                  |
| <i>xxxvii</i>  | 0.60           | 329.2 | 0.52           | 0.43               | 1.52 | <b>-0.24</b>  | -0.20         | 0.25             |                 | 0.06           | -0.01          | -0.31             |                  |
| <i>xxxviii</i> | 0.53           | 332.5 | 0.53           | 0.43               | 1.50 | <b>-0.25</b>  | -0.15         | 0.31             | 0.03            | 0.07           | 0              | -0.27             | 0.23             |
| <i>xxxix</i>   | 0.53           | 335.5 | 0.53           | 0.42               | 1.50 | <b>-0.24</b>  | -0.2          | 0.31             | -0.04           | 0.06           | -0.02          | -0.24             | 0.19             |
| <i>xxxx</i>    | 0.57           | 334.4 | 0.55           | 0.44               | 1.47 | -0.31         | -0.11         | 0.42             | 0.01            | 0.06           | 0.04           | -0.14             | 0.19             |

262 Notes: All R<sup>2</sup> are significant at  $p < 0.0001$ ; RMSE is in °C. Nonlinear coefficients were estimated for the quadratic  
 263 term within the hierarchical mixed model.

264 Table S5. Statistics of the main  $\Delta T$  models used in the main manuscript. Directional ( $\beta$ ) and  
 265 nonlinear ( $\gamma$ ) coefficients represent the linear and quadratic terms, respectively, within the  
 266 modelling framework. In red are the statistically significant coefficients ( $p < 0.05$ ), while bold  
 267 italics denote marginal significance ( $0.05 \leq p < 0.10$ ). B is the baseline model, and + $g_{sw}$ , + $LAI$ ,  
 268 +height, and + $T_{soil}$  models correspond to *v*, *xxvi*, *xxvii*, and *xxix* in Table S4.

| Model        | $\beta_{CO_2}$ | AICc  | R <sup>2</sup> | R <sup>2</sup> adj | RMSE | $\beta_{g_{sw}}$ | $\beta_{LAI}$ | $\beta_{height}$ | $\beta_{T_{soil}}$ | $\gamma_{g_{sw}}$ | $\gamma_{LAI}$ | $\gamma_{height}$ | $\gamma_{T_{soil}}$ |
|--------------|----------------|-------|----------------|--------------------|------|------------------|---------------|------------------|--------------------|-------------------|----------------|-------------------|---------------------|
| B            | 0.52           | 374.7 | 0.38           | 0.31               | 1.77 |                  |               |                  |                    |                   |                |                   |                     |
| + $g_{sw}$   | 0.52           | 325.9 | 0.47           | 0.39               | 1.60 | -0.42            |               |                  |                    | 0.10              |                |                   |                     |
| + $LAI$      | 0.52           | 330.0 | 0.49           | 0.40               | 1.57 | -0.40            | -0.13         |                  |                    | 0.09              | 0.02           |                   |                     |
| + height     | 0.53           | 329.7 | 0.51           | 0.42               | 1.54 | -0.36            | -0.17         | 0.30             |                    | 0.06              | 0              | -0.29             |                     |
| + $T_{soil}$ | 0.47           | 335.1 | 0.52           | 0.42               | 1.51 | -0.34            | -0.18         | 0.36             | -0.07              | 0.06              | -0.01          | -0.21             | 0.20                |

269

270 Table S6. Statistics of the  $\Delta T$  models excluding [CO<sub>2</sub>] from the model. Directional ( $\beta$ ) and  
 271 nonlinear ( $\gamma$ ) coefficients represent the linear and quadratic terms, respectively, within the  
 272 modelling framework. In red are the statistically significant coefficients ( $p < 0.05$ ), while bold  
 273 italics denote marginal significance ( $0.05 \leq p < 0.10$ ).

| Model                       | AICc  | R <sup>2</sup> | R <sup>2</sup> adj | RMSE | $\beta_{g_{sw}}$ | $\beta_{LAI}$ | $\beta_{height}$ | $\beta_{T_{soil}}$ | $\gamma_{g_{sw}}$ | $\gamma_{LAI}$ | $\gamma_{height}$ | $\gamma_{T_{soil}}$ |
|-----------------------------|-------|----------------|--------------------|------|------------------|---------------|------------------|--------------------|-------------------|----------------|-------------------|---------------------|
| B                           | 386.2 | 0.31           | 0.25               | 0.83 |                  |               |                  |                    |                   |                |                   |                     |
| + $g_{sw}$                  | 335.4 | 0.41           | 0.33               | 0.76 | -0.39            |               |                  |                    | 0.04              |                |                   |                     |
| + [ $g_{sw} \times VPD$ ]   | 338.0 | 0.41           | 0.33               | 0.76 | -0.38            |               |                  |                    | 0.04              |                |                   |                     |
| + $LAI$                     | 337.7 | 0.43           | 0.35               | 0.74 | -0.45            | 0.19          |                  |                    | 0.08              | 0.08           |                   |                     |
| + height                    | 337.7 | 0.46           | 0.36               | 0.72 | -0.42            | 0.11          | <b>0.49</b>      |                    | 0.05              | 0.09           | <b>-0.24</b>      |                     |
| B + $g_{sw}$ + $LAI$        | 335.0 | 0.43           | 0.35               | 0.74 | -0.46            | 0.19          |                  |                    | 0.08              | 0.08           |                   |                     |
| + height                    | 334.8 | 0.46           | 0.37               | 0.72 | -0.43            | 0.11          | <b>0.49</b>      |                    | 0.05              | 0.09           | <b>-0.24</b>      |                     |
| + $T_{soil}$                | 332.5 | 0.49           | 0.40               | 0.70 | -0.41            | 0.10          | <b>0.50</b>      | -0.35              | 0.08              | 0.09           | -0.22             | 0.31                |
| + [ $g_{sw} \times VPD$ ]   | 335.5 | 0.49           | 0.39               | 0.70 | -0.42            | 0.10          | <b>0.50</b>      | -0.34              | 0.08              | 0.09           | -0.22             | <b>0.32</b>         |
| + [ $LAI \times T_{soil}$ ] | 338.5 | 0.49           | 0.38               | 0.70 | -0.42            | 0.09          | <b>0.50</b>      | -0.36              | 0.07              | 0.09           | -0.21             | <b>0.30</b>         |

274

275

276

277

278 **References**

- 279 1. Israel Meteorological Service.
- 280 2. Miglietta, F. *et al.* Free-air CO<sub>2</sub> enrichment (FACE) of a poplar plantation: the POPFACE  
281 fumigation system. *New Phytol.* **150**, 465–476 (2001).
- 282 3. Mollah, M., Norton, R. & Huzzey, J. Australian grains free-air carbon dioxide enrichment  
283 (AGFACE) facility: Design and performance. *Crop Pasture Sci.* **60**, 697–707 (2009).
- 284 4. Reis, M. G. dos & Ribeiro, A. Conversion factors and general equations applied in agricultural and  
285 forest meteorology. *Agrometeoros* **27**, 227–258 (2020).
- 286 5. Helman, D., Lensky, I. M. & Bonfil, D. J. Early prediction of wheat grain yield production from  
287 root-zone soil water content at heading using Crop RS-Met. *F. Crop. Res.* **232**, (2019).
- 288 6. Bonfil, D. J., Richkar, I. & Gilboa, A. Wheat cultivars in Israel: a multiyear summary 2007-2017  
289 (Hebrew). *Nir Vatelem* 6–10 (2018).
